# Supplementary material for: Steady state analysis of the genetic regulatory network incorporating underlying molecular mechanisms for anaerobic metabolism in Escherichia coli
Source: Royal Society of Chemistry journal article supplement (doi:10.1039/c3mb70483a), 2013-11-25
Supplement: c3mb70483a.xlsx [file c3mb70483a.xlsx]

## Sheet: SSGES Prediction
Pathway	Reactions	Enzymes	Genes	WT	FNR Experiment	FNR Model	ARCA Experiment	ARCA Model	AF Experiment	AF Model
Glycolysis	PEP ==> G6P + Pyr	PTS I	ptsi	0.997599	-0.156	1.22111e-05	-0.075	-1.11971e-05	0.049	-2.00348e-05
			ptsh	0.997599	-0.277	1.22111e-05	-0.128	-1.11971e-05	0.037	-2.00348e-05
			malx	0.997599	-0.135	1.22111e-05	-0.056	-1.11971e-05	-0.15	-2.00348e-05
			crr	0.997599	-0.158	1.22111e-05	0.042	-1.11971e-05	0.258	-2.00348e-05
	DHAP + NADH <==> Glyc3P	glycerol-3-phosphate dehydrogenase	gpsa	1	0.072	0	0.041	0	0.099	0
	G6P <==> F6P	glucose-6-phosphate isomerase	pgi	1	0.39	0.39	0.238	0.238	0.478	0.478
	F6P + ATP ==> F16P	Phosphofructokinase	pfka	0.999709	-0.499	-1.94799e-05	-0.12	1.77243e-06	-0.389	-2.53449e-05
	F16P <==> DHAP + G3P	fructose-bisphosphate aldolase	fbaa	0.997599	-0.053	1.21719e-05	-0.059	-1.11971e-05	0.03	-1.11971e-05
	DHAP <==> G3P	triose-phosphate isomerase	tpia	0.999709	-0.21	-1.94799e-05	-0.122	1.77243e-06	-0.949	-2.53449e-05
	G3P <==> DPG + NADH	glyceraldehyde-3-phosphate dehydrogenase	gapa	0.997599	-0.171	1.22111e-05	-0.019	-1.11971e-05	-0.132	-2.00348e-05
	DPG <==> 3PG + ATP	phosphoglycerate kinase	pgk	0.997599	0.087	1.21719e-05	-0.001	-1.11971e-05	-1.11971e-05	0
	3PG <==> 2PG	Phosphoglycerate mutase (dependent)	gpmm	0.999709	-0.49	-1.94799e-05	-0.436	1.77243e-06	1.77243e-06	0
	2PG <==> PEP	Enolase	eno	0.999971	0.097	-1.9457e-06	-0.102	1.78066e-07	1.78066e-07	0
	PEP ==> Pyr + ATP	Pyruvate kinase	pyka	1	-1.491	-2.5508	-0.506	0	0	0
			pykf	0.999971	0.048	-1.9457e-06	-0.175	1.78066e-07	1.78066e-07	0
	PEP + CO2 ==> OxA	phosphoenolpyruvate carboxylase	ppc	0.774606	-0.259	-0.0148348	-0.19	0.00137848	-0.272	-0.0192048
MAF	Pyr ==> AcCoA + NADH + CO2	Pyruvate dehydrogenase	acee	0.00103372	1.17	2.19223	1.008	1.65525	0.92	2.91698
			acef	0.00103372	1.338	2.19223	1.038	1.65525	0.975	2.91698
			lpd	0.000104562	1.169	1.5269	1.689	2.18005	1.626	2.75914
	NADH + Adh <==> Eth	alcohol dehydrogenase	adhE	0.789797	-0.319	-0.70891	-0.211	0.0404722	-0.063	-0.643965
	AcCoA <==> AcP	phosphotransacetylase	pta	0.81352	-0.787	-1.24491	-0.491	-0.00873033	-1.174	-6.52571
	AcP <==> ATP + Ac	acetate kinase	acka	0.81352	-0.768	-1.24491	-0.481	-0.00873033	-1.362	-6.52571
	Pyr ==> AcCoA + Form	pyruvate formate lyase	pflb	0.84931	-0.414	-0.659927	-0.216	0.00893224	-0.677	-0.634729
	Pyr ==> AcCoA + Form		tdce	1	0.005	-4.34294e-09	0.111	0	0.018	-4.34294e-09
	Pyr + NADH <==> Lac	lactate dehydrogenase	ldha	0.0215446	0.144	0.899256	-0.389	1.66664	0.769	1.66665
	Fum + QuiH2 ==> Succ	fumarate reductase	frda	0.789799	-1.297	-0.736694	-0.284	0.0404728	-0.505	-0.642337
			frdb	0.789799	-1.274	-0.736694	-0.102	0.0404728	-0.579	-0.642337
			frdc	0.789799	-1.444	-0.736694	-0.254	0.0404728	-0.77	-0.642337
			frdd	0.789799	-1.194	-0.736694	-0.166	0.0404728	-0.491	-0.642337
TCA	AcCoA + OxA ==> Cit	Citrate Synthase	glta	0.296136	0.309	0.431146	1.0889	0.528506	1.83	0.528506
	Cit <==> ICit	Aconitase	acna	0.000452003	0.616	1.12778	1.232	0.515073	1.8	3.34343
			acnb	0.00219179	0.613	0.963267	2.077	2.65779	1.612	2.65788
	ICit <==> alKG + NADPH + CO2	Isocitrate dehydrogenase	icd	6.25119e-06	0.406	0.96153	1.527	1.6616	1.632	1.74713
	alKG ==> SuccCoA + NADH + CO2	2-Oxogluterate dehydrogenase	sucA	8.376e-07	0.471	2.75635	2.626	2.9734	2.373	3.44391
			sucb	8.376e-07	0.693	2.75635	2.704	2.9734	2.436	3.44391
	SuccCoA <==> Succ + ATP	succinyl-CoA synthetase	succ	8.376e-07	0.82	2.75635	2.476	2.9734	2.358	3.44391
			sucd	8.376e-07	0.571	2.75635	2.478	2.9734	2.292	3.44391
	Fum <==> Mal	fumarase	fumb	0.790213	-0.893	-0.236143	-0.468	0.0403736	-0.755	-0.1123
			fumc	1.38976e-05	0.132	1.46674	1.097	0.850845	0.863	1.56716
	Mal <==> OxA + NADH	malate dehydrogenase	mdh	0.000914418	0.87	0.972599	2.566	3.03833	2.576	3.0386
Glyoxylate shunt	ICit ==> Succ + Glyox	Isocitrate lyase	acea	0.00114847	0.901	0.267756	1.689	0.324821	1.488	0.328439
	AcCoA + Glyox ==> Mal	malate synthase	glcb	0.00219703	0.359	0.924236	1.892	2.17942	3.02	1.44317
PPP	G6P <==> PGlac + NADPH	glucose 6-phosphate dehydrogenase	zwf	0.000782075	0.115	0.752101	0.074	0.0316068	0.222	0.558855
	PGluc ==> Rl5P + NADPH + CO2		gnd	0.00271232	-0.068	0.587332	-0.207	-1.75206	-0.118	0.472302
Log Fold Changes of all mutants with respect to WT as predicted by SSGES
	WT	A	D	I	F	AI	DI	FI	AF	AD	FD	AID	FAD	FAI	FID	FAID
ptsi	0	-1.11971e-05	1.0927e-06	-4.88889e-06	1.22111e-05	-1.32911e-05	-5.5332e-06	-6.55626e-06	-2.00348e-05	-9.64723e-06	-5.28505e-06	-1.17587e-05	-1.43447e-05	0.000106654	-4.61027e-06	2.1453e-05
ptsh	0	-1.11971e-05	1.0927e-06	-4.88889e-06	1.22111e-05	-1.32911e-05	-5.5332e-06	-6.55626e-06	-2.00348e-05	-9.64723e-06	-5.28505e-06	-1.17587e-05	-1.43447e-05	0.000106654	-4.61027e-06	2.1453e-05
malx	0	-1.11971e-05	1.0927e-06	-4.88889e-06	1.22111e-05	-1.32911e-05	-5.5332e-06	-6.55626e-06	-2.00348e-05	-9.64723e-06	-5.28505e-06	-1.17587e-05	-1.43447e-05	0.000106654	-4.61027e-06	2.1453e-05
crr	0	-1.11971e-05	1.0927e-06	-4.88889e-06	1.22111e-05	-1.32911e-05	-5.5332e-06	-6.55626e-06	-2.00348e-05	-9.64723e-06	-5.28505e-06	-1.17587e-05	-1.43447e-05	0.000106654	-4.61027e-06	2.1453e-05
gpsa	0	0	0	0	0	0	0	0	0	0	0	0	0	0	0	0
pgi	0	0	0	0	0	0	0	0	0	0	0	0	0	0	0	0
pfka	0	1.77243e-06	-1.05566e-05	-6.37734e-06	-1.94799e-05	-1.29199e-05	-1.93104e-05	-2.06746e-05	-2.53449e-05	-1.69949e-05	-1.00309e-05	-2.14479e-05	-2.9671e-06	-1.90324e-05	-2.05747e-05	-2.82687e-05
fbaa	0	0.00103165	0.00103042	0.00103084	0.00102953	0.00103018	0.00102955	0.00102941	0.00102894	0.00102978	0.00103047	0.00102933	0.00103118	0.00102957	0.00102942	0.00102865
tpia	0	0.00012635	0.00012635	0.000126337	0.000126346	0.000126337	0.00012632	0.000117473	0.000126346	0.00012635	0.000126346	0.000126337	0.000126346	0.000118446	0.000117491	0.000117716
gapa	0	-1.11971e-05	1.0927e-06	-4.88889e-06	1.22111e-05	-1.32911e-05	-5.5332e-06	-6.55626e-06	-2.00348e-05	-9.64723e-06	-5.28505e-06	-1.17587e-05	-1.43447e-05	0.000106654	-4.61027e-06	2.1453e-05
pgk	0	-1.11971e-05	1.07093e-06	-4.90631e-06	1.21719e-05	-1.3326e-05	-5.57674e-06	-6.60851e-06	-2.01001e-05	-9.69077e-06	-5.31118e-06	-1.18109e-05	-1.43534e-05	0.000106645	-4.65816e-06	2.13921e-05
gpmm	0	1.77243e-06	-1.05566e-05	-6.37734e-06	-1.94799e-05	-1.29199e-05	-1.93104e-05	-2.06746e-05	-2.53449e-05	-1.69949e-05	-1.00309e-05	-2.14479e-05	-2.9671e-06	-1.90324e-05	-2.05747e-05	-2.82687e-05
eno	0	1.78066e-07	-1.05537e-06	-6.38432e-07	-1.9457e-06	-1.28989e-06	-1.92833e-06	-2.06731e-06	-2.53202e-06	-1.69814e-06	-1.00325e-06	-2.14548e-06	-2.95329e-07	-1.90227e-06	-2.05862e-06	-2.82735e-06
pyka	0	0	0	0	-2.5508	4.10389e-05	0.009757	-0.00133114	-3.05729	-5.81955e-07	-2.48535	0	-2.19889e-05	-0.0118528	-6.36246e-06	-3.24888
pykf	0	1.78066e-07	-1.05537e-06	-6.38432e-07	-1.9457e-06	-1.28989e-06	-1.92833e-06	-2.06731e-06	-2.53202e-06	-1.69814e-06	-1.00325e-06	-2.14548e-06	-2.95329e-07	-1.90227e-06	-2.05862e-06	-2.82735e-06
ppc	0	0.00137848	-0.0081015	-0.00491228	-0.0148348	-0.00989525	-0.0147098	-0.0157316	-0.0192048	-0.0129712	-0.00770118	-0.0163066	-0.00228996	-0.0145015	-0.0156557	-0.0213676
acee	0	1.65525	-0.000802513	0.00237102	2.19223	1.66586	0.652085	1.56921	2.91698	1.6476	1.61989	1.66279	2.64901	2.78701	1.57071	2.74807
acef	0	1.65525	-0.000802513	0.00237102	2.19223	1.66586	0.652085	1.56921	2.91698	1.6476	1.61989	1.66279	2.64901	2.78701	1.57071	2.74807
lpd	0	2.18005	0.00260119	0.00233613	1.5269	2.51483	0.294582	0.937601	2.75914	1.9879	1.62325	2.38909	1.91373	2.21949	0.951034	2.12098
adhE	0	0.0404722	-0.381996	-0.00589616	-0.70891	-0.468147	-0.623675	-0.726454	-0.643965	-0.524296	-0.673263	-0.44653	-0.865693	-0.746589	-0.729921	-0.839967
pta	0	-0.00873033	7.97173e-05	-0.000547217	-1.24491	-0.00952446	-0.105374	-0.626096	-6.52571	-0.00859816	-0.656372	-0.00929672	-6.2114	-6.59707	-0.626894	-9.26441
acka	0	-0.00873033	7.97173e-05	-0.000547217	-1.24491	-0.00952446	-0.105374	-0.626096	-6.52571	-0.00859816	-0.656372	-0.00929672	-6.2114	-6.59707	-0.626894	-9.26441
pflb	0	0.00893224	-0.303308	0.0132291	-0.659927	-0.499663	-0.429258	-0.912325	-0.634729	-0.555705	-0.624372	-0.478002	-0.888878	-0.774951	-0.914941	-0.768116
tdce	0	0	0	-1.30288e-08	-4.34294e-09	-1.30288e-08	-3.04006e-08	-8.87707e-06	-4.34294e-09	0	-4.34294e-09	-1.30288e-08	-4.34294e-09	-7.90423e-06	-8.8597e-06	-8.63386e-06
ldha	0	1.66664	-0.00043916	-0.000798482	0.899256	1.66666	0.282992	0.271715	1.66665	1.66666	0.307343	1.66666	1.66664	1.66665	0.272663	1.66666
frda	0	0.0404728	-0.381944	-0.00589366	-0.736694	-0.468114	-0.623686	-0.766571	-0.642337	-0.524155	-0.700648	-0.446447	-0.93742	-0.769248	-0.766562	-0.77484
frdb	0	0.0404728	-0.381944	-0.00589366	-0.736694	-0.468114	-0.623686	-0.766571	-0.642337	-0.524155	-0.700648	-0.446447	-0.93742	-0.769248	-0.766562	-0.77484
frdc	0	0.0404728	-0.381944	-0.00589366	-0.736694	-0.468114	-0.623686	-0.766571	-0.642337	-0.524155	-0.700648	-0.446447	-0.93742	-0.769248	-0.766562	-0.77484
frdd	0	0.0404728	-0.381944	-0.00589366	-0.736694	-0.468114	-0.623686	-0.766571	-0.642337	-0.524155	-0.700648	-0.446447	-0.93742	-0.769248	-0.766562	-0.77484
glta	0	0.528506	-6.78325e-05	-2.66352	0.431146	0.527451	-2.37129	-2.38333	0.528506	0.528507	0.196779	0.527453	0.528506	0.52729	-2.38177	0.527485
acna	0	0.515073	-9.85627e-05	-0.00098652	1.12778	0.518392	0.32151	0.433314	3.34343	0.514912	0.470804	0.517741	3.34306	3.34364	0.43487	3.34384
acnb	0	2.65779	-0.000446792	-0.000819631	0.963267	2.658	0.290947	0.279239	2.65788	2.658	0.316267	2.65799	2.65775	2.65802	0.280224	2.65802
icd	0	1.6616	0.0343027	0.0205219	0.96153	1.71004	0.3446	0.337363	1.74713	1.72256	0.340444	1.73584	1.67782	1.72869	0.338011	1.75544
sucA	0	2.9734	-0.00175177	2.62514	2.75635	5.60071	3.73887	3.95321	3.44391	2.97297	1.42966	5.59997	3.44407	6.07094	3.956	6.07037
sucb	0	2.9734	-0.00175177	2.62514	2.75635	5.60071	3.73887	3.95321	3.44391	2.97297	1.42966	5.59997	3.44407	6.07094	3.956	6.07037
succ	0	2.9734	-0.00175177	2.62514	2.75635	5.60071	3.73887	3.95321	3.44391	2.97297	1.42966	5.59997	3.44407	6.07094	3.956	6.07037
sucd	0	2.9734	-0.00175177	2.62514	2.75635	5.60071	3.73887	3.95321	3.44391	2.97297	1.42966	5.59997	3.44407	6.07094	3.956	6.07037
fumb	0	0.0403736	-0.381507	-0.00605048	-0.236143	-0.467633	-0.621945	-0.437134	-0.1123	-0.523653	-0.368769	-0.445979	-0.261371	-0.180247	-0.438318	-0.177158
fumc	0	0.850845	0.148265	-0.0800186	1.46674	2.53574	1.52032	2.89829	1.56716	2.49483	0.432844	1.26797	4.22888	4.54812	2.92733	3.64052
mdh	0	3.03833	-2.99944	-0.00284341	0.972599	3.03886	-2.70988	0.276836	3.0386	3.03885	-2.68435	3.03885	2.69268	3.03866	-2.72013	3.0384
acea	0	0.324821	-0.000451707	0.276784	0.267756	0.325493	0.298698	0.2969	0.328439	0.324184	0.138339	0.32491	0.326113	0.260827	0.296156	0.310492
glcb	0	2.17942	-0.000440245	-0.00081429	0.924236	2.51035	0.288412	0.272863	1.44317	1.98773	0.316238	2.38566	0.597838	0.902741	0.274062	0.804657
zwf	0	0.0316068	-0.000440245	-0.00081429	0.924236	2.51035	0.288412	0.272863	1.44317	1.98773	0.316238	2.38566	0.597838	0.902741	0.274062	0.804657
gnd	0	-1.75206	0.113296	0.0071311	0.587332	0.56717	0.566153	0.642429	0.472302	0.454564	0.599272	0.447159	0.63675	0.620785	0.642339	0.634595
