# Supplementary material for: Steady state analysis of the genetic regulatory network incorporating underlying molecular mechanisms for anaerobic metabolism in Escherichia coli
Source: Royal Society of Chemistry journal article supplement (doi:10.1039/c3mb70483a), 2013-11-25
Supplement: c3mb70483a_2.xlsx [file c3mb70483a_2.xlsx]

## Sheet: Modified GRN
Pathway	Reactions	Enzymes	Genes	WT	D	A	I	F	AI	DI	FI	AF	AD	FD	AID	FAD	FAI	FID	FAID
Glycolysis	PEP ==> G6P + Pyr	PTS I	ptsi	0.000174297	-5.51579e-06	0.000164841	-4.7104e-06	0.00016662	-1.33347e-05	-3.42178e-06	-1.25249e-05	0.000175354	0.000175354	-9.27718e-06	-2.64687e-06	-1.14757e-05	-1.8646e-05	-2.40706e-05	-3.14752e-06
			ptsh	0.000174297	-5.51579e-06	0.000164841	-4.7104e-06	0.00016662	-1.33347e-05	-3.42178e-06	-1.25249e-05	0.000175354	0.000175354	-9.27718e-06	-2.64687e-06	-1.14757e-05	-1.8646e-05	-2.40706e-05	-3.14752e-06
			malx	0.000174297	-5.51579e-06	0.000164841	-4.7104e-06	0.00016662	-1.33347e-05	-3.42178e-06	-1.25249e-05	0.000175354	0.000175354	-9.27718e-06	-2.64687e-06	-1.14757e-05	-1.8646e-05	-2.40706e-05	-3.14752e-06
			crr	0.000174297	-5.51579e-06	0.000164841	-4.7104e-06	0.00016662	-1.33347e-05	-3.42178e-06	-1.25249e-05	0.000175354	0.000175354	-9.27718e-06	-2.64687e-06	-1.14757e-05	-1.8646e-05	-2.40706e-05	-3.14752e-06
	DHAP + NADH <==> Glyc3P	glycerol-3-phosphate dehydrogenase	gpsa	0	0	0	0	0	0	0	0	0.30103	0	0	0	0	0	0	0
	G6P <==> F6P	glucose-6-phosphate isomerase	pgi	0	0	0	0	0	0	0	0	0	0	0	0	0	0	0	0
	F6P + ATP ==> F16P	Phosphofructokinase	pfka	-1.3111e-05	-3.31997e-05	-5.86334e-05	2.27631e-05	-3.43727e-05	-8.95351e-06	-1.96793e-06	-3.00326e-05	-3.08754e-05	-3.08754e-05	-3.02237e-05	1.18639e-05	-2.213e-05	-2.33464e-05	-6.34259e-06	-3.57196e-05
	F16P <==> DHAP + G3P	fructose-bisphosphate aldolase	fbaa	0.000174323	-5.59415e-06	0.000164771	-4.65381e-06	0.000166603	-1.33608e-05	-3.42614e-06	-1.26033e-05	0.000175346	0.000175346	-9.3512e-06	-2.6164e-06	-1.1528e-05	-1.8707e-05	-2.40924e-05	-3.23459e-06
	DHAP <==> G3P	triose-phosphate isomerase	tpia	-1.3111e-05	-3.31997e-05	-5.86334e-05	2.27631e-05	-3.43727e-05	-8.95351e-06	-1.96793e-06	-3.00326e-05	-3.08754e-05	-3.08754e-05	-3.02237e-05	1.18639e-05	-2.213e-05	-2.33464e-05	-6.34259e-06	-3.57196e-05
	G3P <==> DPG + NADH	glyceraldehyde-3-phosphate dehydrogenase	gapa	0.000174297	-5.51579e-06	0.000164841	-4.7104e-06	0.00016662	-1.33347e-05	-3.42178e-06	-1.25249e-05	0.000175354	0.000175354	-9.27718e-06	-2.64687e-06	-1.14757e-05	-1.8646e-05	-2.40706e-05	-3.14752e-06
	DPG <==> 3PG + ATP	phosphoglycerate kinase	pgk	0.000174323	-5.59415e-06	0.000164771	-4.65381e-06	0.000166603	-1.33608e-05	-3.42614e-06	-1.26033e-05	0.000175346	0.000175346	-9.3512e-06	-2.6164e-06	-1.1528e-05	-1.8707e-05	-2.40924e-05	-3.23459e-06
	3PG <==> 2PG	Phosphoglycerate mutase (dependent)	gpmm	-1.3111e-05	-3.31997e-05	-5.86334e-05	2.27631e-05	-3.43727e-05	-8.95351e-06	-1.96793e-06	-3.00326e-05	-3.08754e-05	-3.08754e-05	-3.02237e-05	1.18639e-05	-2.213e-05	-2.33464e-05	-6.34259e-06	-3.57196e-05
	2PG <==> PEP	Enolase	eno	-1.31161e-06	-3.31812e-06	-5.86319e-06	2.28011e-06	-3.43538e-06	-8.94674e-07	-1.95438e-07	-3.00107e-06	-3.08793e-06	-3.08793e-06	-3.02279e-06	1.19e-06	-2.21063e-06	-2.33224e-06	-6.34089e-07	-3.57002e-06
	PEP ==> Pyr + ATP	Pyruvate kinase	pyka	0.026076	0.00629785	0.026254	0	-0.00534162	0	0	-2.85767e-06	-0.0235809	-0.0235809	3.64806e-06	-1.92353e-05	0.000230419	-0.00053752	-0.0171083	-0.00016051
			pykf	-1.31161e-06	-3.31812e-06	-5.86319e-06	2.28011e-06	-3.43538e-06	-8.94674e-07	-1.95438e-07	-3.00107e-06	-3.08793e-06	-3.08793e-06	-3.02279e-06	1.19e-06	-2.21063e-06	-2.33224e-06	-6.34089e-07	-3.57002e-06
	PEP + CO2 ==> OxA	phosphoenolpyruvate carboxylase	ppc	-0.0100416	-0.0249911	-0.0432092	0.0180055	-0.0258486	-0.00688225	-0.00152207	-0.0226661	-0.0232865	-0.0232865	-0.0228089	0.00929169	-0.0168173	-0.0177228	-0.00488652	-0.026831
MAF	Pyr ==> AcCoA + NADH + CO2	Pyruvate dehydrogenase	acee	2.96784	1.19738	2.9777	-0.358734	2.97656	1.30506	-0.359543	1.76692	2.98422	2.98422	1.30554	1.31353	1.33357	2.91711	2.91708	1.76362
			acef	2.96784	1.19738	2.9777	-0.358734	2.97656	1.30506	-0.359543	1.76692	2.98422	2.98422	1.30554	1.31353	1.33357	2.91711	2.91708	1.76362
			lpd	3.84941	1.24152	3.91351	-0.377502	3.86558	1.99927	-0.357594	1.74369	3.93142	3.93142	1.83078	1.25186	1.80702	2.76009	2.76007	1.78311
	NADH + Adh <==> Eth	alcohol dehydrogenase	adhE	-0.917734	-0.580199	-0.906915	-0.604751	-0.908086	-0.0741669	-0.103924	-0.74804	-0.919881	-0.919881	-0.440253	-0.0184252	-0.657162	-0.37539	-0.451519	-0.789861
	AcCoA <==> AcP	phosphotransacetylase	pta	-0.0889742	-0.15639	-0.136445	0.0466355	-1.00322	0.0445856	0.0466854	-0.787789	-4.99366	-4.99366	0.0441127	-0.416892	0.0409912	-8.66304	-7.35597	-0.784266
	AcP <==> ATP + Ac	acetate kinase	acka	-0.0889742	-0.15639	-0.136445	0.0466355	-1.00322	0.0445856	0.0466854	-0.787789	-4.99366	-4.99366	0.0441127	-0.416892	0.0409912	-8.66304	-7.35597	-0.784266
	Pyr ==> AcCoA + Form	pyruvate formate lyase	pflb	-0.793928	-0.479131	-0.938397	-0.412863	-0.784452	-0.105649	-0.0444067	-0.657756	-0.945326	-0.945326	-0.471804	-0.0321063	-0.68875	-0.406741	-0.484625	-0.646998
	Pyr ==> AcCoA + Form		tdce	0	0	0	-4.34294e-09	-4.34294e-09	-4.34294e-09	-4.34294e-09	-8.92484e-06	-4.34294e-09	-4.34294e-09	0	-4.34294e-09	-4.34294e-09	-4.34294e-09	-9.02473e-06	-8.84667e-06
	Pyr + NADH <==> Lac	lactate dehydrogenase	ldha	0.574458	0.741485	1.66665	-0.00120219	0.676169	1.66664	-0.00171533	0.454781	1.66665	1.66665	1.66666	0.00158693	1.66666	1.66666	1.66666	0.450968
	Fum + QuiH2 ==> Succ	fumarate reductase	frda	-0.9177	-0.580196	-0.906965	-0.604515	-0.917732	-0.0741585	-0.103919	-0.802735	-0.922213	-0.922213	-0.440255	-0.0246841	-0.657167	-0.391313	-0.473618	-0.838905
			frdb	-0.9177	-0.580196	-0.906965	-0.604515	-0.917732	-0.0741585	-0.103919	-0.802735	-0.922213	-0.922213	-0.440255	-0.0246841	-0.657167	-0.391313	-0.473618	-0.838905
			frdc	-0.9177	-0.580196	-0.906965	-0.604515	-0.917732	-0.0741585	-0.103919	-0.802735	-0.922213	-0.922213	-0.440255	-0.0246841	-0.657167	-0.391313	-0.473618	-0.838905
			frdd	-0.9177	-0.580196	-0.906965	-0.604515	-0.917732	-0.0741585	-0.103919	-0.802735	-0.922213	-0.922213	-0.440255	-0.0246841	-0.657167	-0.391313	-0.473618	-0.838905
TCA	AcCoA + OxA ==> Cit	Citrate Synthase	glta	0.395079	0.385428	0.528507	-2.66387	0.392184	0.526707	-2.66402	-2.19264	0.528507	0.528507	0.528507	0.00141159	0.527453	0.528507	0.527404	-2.19396
	Cit <==> ICit	Aconitase	acna	0.584386	0.676553	0.997836	-0.149272	0.919604	0.148278	-0.149372	0.62402	3.3431	3.3431	0.154278	0.156159	0.183995	3.34379	3.34375	0.622718
			acnb	0.661956	0.782085	2.65801	-0.00123058	0.70974	2.65778	-0.00175261	0.470947	2.65805	2.65805	2.65799	0.00161575	2.65798	2.65799	2.65799	0.466922
	ICit <==> alKG + NADPH + CO2	Isocitrate dehydrogenase	icd	0.675402	0.842632	1.83328	-0.0872611	0.780464	1.69748	0.00497796	0.547159	1.76268	1.76268	1.7609	-0.0411276	1.73785	1.74139	1.68904	0.558816
	alKG ==> SuccCoA + NADH + CO2	2-Oxogluterate dehydrogenase	sucA	5.78545	2.272	5.81631	2.34565	5.81907	5.32424	2.34349	4.45852	5.77895	5.77895	2.70344	0.473994	5.35288	3.44393	6.07024	4.4487
			sucb	5.78545	2.272	5.81631	2.34565	5.81907	5.32424	2.34349	4.45852	5.77895	5.77895	2.70344	0.473994	5.35288	3.44393	6.07024	4.4487
	SuccCoA <==> Succ + ATP	succinyl-CoA synthetase	succ	5.78545	2.272	5.81631	2.34565	5.81907	5.32424	2.34349	4.45852	5.77895	5.77895	2.70344	0.473994	5.35288	3.44393	6.07024	4.4487
			sucd	5.78545	2.272	5.81631	2.34565	5.81907	5.32424	2.34349	4.45852	5.77895	5.77895	2.70344	0.473994	5.35288	3.44393	6.07024	4.4487
	Fum <==> Mal	fumarase	fumb	-0.915803	-0.578033	-0.904518	-0.604414	-0.422894	-0.074243	-0.103977	-0.398068	-0.274567	-0.274567	-0.440182	0.0343328	-0.657035	-0.0135594	-0.0439543	-0.431048
			fumc	4.78049	2.49145	4.81233	1.87495	4.77058	0.581351	-0.258174	1.74765	4.81913	4.81913	1.68888	-1.94402	2.67867	-1.22364	-0.436616	2.18449
	Mal <==> OxA + NADH	malate dehydrogenase	mdh	0.743175	-2.21479	3.03859	-0.00272563	0.787425	3.03833	-3.00263	0.467334	3.03861	3.03861	3.03885	-2.99893	3.03885	3.03704	3.03883	-2.53198
Glyoxylate shunt	ICit ==> Succ + Glyox	Isocitrate lyase	acea	0.163077	0.250965	0.245628	0.276662	0.173887	0.32559	0.276141	0.30876	0.240406	0.240406	0.324032	0.00137127	0.324778	0.327874	0.329901	0.304824
	AcCoA + Glyox ==> Mal	malate synthase	glcb	0.436286	0.7821	0.782133	-0.00126864	0.482018	2.35304	-0.00174475	0.470673	0.880524	0.880524	2.17973	0.00146921	2.12628	1.444	1.44403	0.466935
PPP	G6P <==> PGlac + NADPH	glucose 6-phosphate dehydrogenase	zwf	1.13557	1.13214	1.138	1.02638	1.14405	-0.231441	-0.253225	0.959479	1.13461	1.13461	0.429691	-2.86719	1.03653	-2.9682	-1.26799	1.10087
	PGluc ==> Rl5P + NADPH + CO2		gnd	0.574458	0.536988	0.579926	0.4754	0.586029	-2.14242	-0.348738	0.571263	0.579393	0.579393	0.397598	0.627032	0.463253	-0.320837	-0.113821	0.587904
Comparison between WT fractional gene expression for unmodified and modified GRN
				WT (Modified)	WT (Unmodified)
Glycolysis	PEP ==> G6P + Pyr	PTS I	ptsi	0.998	0.997599
			ptsh	0.998	0.997599
			malx	0.998	0.997599
			crr	0.998	0.997599
	DHAP + NADH <==> Glyc3P	glycerol-3-phosphate dehydrogenase	gpsa	1	1
	G6P <==> F6P	glucose-6-phosphate isomerase	pgi	1	1
	F6P + ATP ==> F16P	Phosphofructokinase	pfka	0.999679	0.999709
	F16P <==> DHAP + G3P	fructose-bisphosphate aldolase	fbaa	0.997999	0.997599
	DHAP <==> G3P	triose-phosphate isomerase	tpia	0.999679	0.999709
	G3P <==> DPG + NADH	glyceraldehyde-3-phosphate dehydrogenase	gapa	0.998	0.997599
	DPG <==> 3PG + ATP	phosphoglycerate kinase	pgk	0.997999	0.997599
	3PG <==> 2PG	Phosphoglycerate mutase (dependent)	gpmm	0.999679	0.999709
	2PG <==> PEP	Enolase	eno	0.999968	0.999971
	PEP ==> Pyr + ATP	Pyruvate kinase	pyka	1.06188	1
			pykf	0.999968	0.999971
	PEP + CO2 ==> OxA	phosphoenolpyruvate carboxylase	ppc	0.756902	0.774606
MAF	Pyr ==> AcCoA + NADH + CO2	Pyruvate dehydrogenase	acee	0.959927	0.00103372
			acef	0.959927	0.00103372
			lpd	0.73923	0.000104562
	NADH + Adh <==> Eth	alcohol dehydrogenase	adhE	0.0954511	0.789797
	AcCoA <==> AcP	phosphotransacetylase	pta	0.662818	0.81352
	AcP <==> ATP + Ac	acetate kinase	acka	0.662818	0.81352
	Pyr ==> AcCoA + Form	pyruvate formate lyase	pflb	0.136502	0.84931
	Pyr ==> AcCoA + Form		tdce	1	1
	Pyr + NADH <==> Lac	lactate dehydrogenase	ldha	0.0101812	0.00271232
	Fum + QuiH2 ==> Succ	fumarate reductase	frda	0.0954589	0.789799
			frdb	0.0954589	0.789799
			frdc	0.0954589	0.789799
			frdd	0.0954589	0.789799
TCA	AcCoA + OxA ==> Cit	Citrate Synthase	glta	0.73548	0.296136
	Cit <==> ICit	Aconitase	acna	0.00173591	0.000452003
			acnb	0.0100636	0.00219179
	ICit <==> alKG + NADPH + CO2	Isocitrate dehydrogenase	icd	2.96049e-05	6.25119e-06
	alKG ==> SuccCoA + NADH + CO2	2-Oxogluterate dehydrogenase	sucA	0.511073	8.376e-07
			sucb	0.511073	8.376e-07
	SuccCoA <==> Succ + ATP	succinyl-CoA synthetase	succ	0.511073	8.376e-07
			sucd	0.511073	8.376e-07
	Fum <==> Mal	fumarase	fumb	0.095927	0.790213
			fumc	0.838359	1.38976e-05
	Mal <==> OxA + NADH	malate dehydrogenase	mdh	0.00506197	0.000914418
Glyoxylate shunt	ICit ==> Succ + Glyox	Isocitrate lyase	acea	0.00167185	0.00114847
	AcCoA + Glyox ==> Mal	malate synthase	glcb	0.00599958	0.00219703
PPP	G6P <==> PGlac + NADPH	glucose 6-phosphate dehydrogenase	zwf	0.0106862	0.000782075
	PGluc ==> Rl5P + NADPH + CO2		gnd	0.0101812	0.00271232
TRs			fnr	1	1
			dpia	0.141206	0.610962
			arca	0.8905	0.0463114
			ihfa	0.0174554	0.0231868
			ihfb	0.0174554	0.0231868
