# Supplementary material for: Steady state analysis of the genetic regulatory network incorporating underlying molecular mechanisms for anaerobic metabolism in Escherichia coli
Source: Royal Society of Chemistry journal article supplement (doi:10.1039/c3mb70483a), 2013-11-25
Supplement: c3mb70483a_3.xlsx [file c3mb70483a_3.xlsx]

## Sheet: Sheet1
All organisms containing sequences corresponding to ldha
UniProt Code	gene	Organism	Length
B7MM29	ldhA	Escherichia coli O45:K1 (strain S88 / ExPEC)	329
C8UPI4	ldhA	Escherichia coli O111:H- (strain 11128 / EHEC)	329
C6UTJ9	ldhA	Escherichia coli O157:H7 (strain TW14359 / EHEC)	329
A1AB14	ldhA	Escherichia coli O1:K1 / APEC	329
G7RRJ0	ldhA	Escherichia coli (strain 'clone D i14')	329
C8U864	ldhA	Escherichia coli O103:H2 (strain 12009 / EHEC)	329
Q1RC13	ldhA	Escherichia coli (strain UTI89 / UPEC)	329
B7LRU2	ldhA	Escherichia fergusonii (strain ATCC 35469 / DSM 13698 / CDC 0568-73)	329
G7R4N4	ldhA	Escherichia coli (strain 'clone D i2')	329
B7L5B8	ldhA	Escherichia coli (strain 55989 / EAEC)	329
Q8FHN9	ldhA	Escherichia coli O6:H1 (strain CFT073 / ATCC 700928 / UPEC)	329
B7NHQ6	ldhA	Escherichia coli O7:K1 (strain IAI39 / ExPEC)	329
B1XD95	ldhA	Escherichia coli (strain K12 / DH10B)	329
C8TRB2	ldhA	Escherichia coli O26:H11 (strain 11368 / EHEC)	329
C6UH22	ldhA	Escherichia coli (strain B / REL606)	329
B7LYM1	ldhA	Escherichia coli O8 (strain IAI1)	329
B7URF5	ldhA	Escherichia coli O127:H6 (strain E2348/69 / EPEC)	329
D3H4J0	ldhA	Escherichia coli O44:H18 (strain 042 / EAEC)	329
D3QSG5	ldhA	Escherichia coli O55:H7 (strain CB9615 / EPEC)	329
B7MUJ6	ldhA	Escherichia coli O81 (strain ED1a)	329
C4ZVC3	ldhA	Escherichia coli (strain K12 / MC4100 / BW2952)	329
D5D2D6	ldhA	Escherichia coli O18:K1:H7 (strain IHE3034 / ExPEC)	329
B7N4F9	ldhA	Escherichia coli O17:K52:H18 (strain UMN026 / ExPEC)	329
E8YAP1	ldhA	Escherichia coli (strain ATCC 55124 / KO11)	329
C9QWX5	ldhA	Escherichia coli (strain ATCC 33849 / DSM 4235 / NCIB 12045 / K12 / DH1)	329
Q8X9Q7	ldhA	Escherichia coli O157:H7	329
C6EEW4	ldhA	Escherichia coli (strain B / BL21-DE3)	329
E0IUJ5	ldhA	Escherichia coli (strain ATCC 9637 / CCM 2024 / DSM 1116 / NCIMB 8666 / NRRL B-766 / W)	329
C3TB72	ldhA	Escherichia coli	329
H4WQI6	ldhA	Escherichia coli DEC7A	329
I2UG64	ldhA	Escherichia coli 4.0522	329
H5MS51	ldhA	Escherichia coli DEC14A	329
H9USV4	ldhA	Escherichia coli P12b	329
H4K293	ldhA	Escherichia coli DEC2A	329
H5V5C6	ldhA	Escherichia hermannii NBRC 105704	329
H4VVK0	ldhA	Escherichia coli DEC6D	329
H5I351	ldhA	Escherichia coli DEC11E	329
I2TTS9	ldhA	Escherichia coli 3.2608	329
H4J7P4	ldhA	Escherichia coli DEC1D	329
I2YVX1	ldhA	Escherichia coli 3003	329
K5H642	ldhA	Escherichia coli 8.0566	329
I2S7Y5	ldhA	Escherichia coli 5.0588	329
H4YVM1	ldhA	Escherichia coli DEC8A	329
H4YEF8	ldhA	Escherichia coli DEC7E	329
I2U6X7	ldhA	Escherichia coli 93.0624	329
H4UIM6	ldhA	Escherichia coli DEC6A	329
I2S2Z7	ldhA	Escherichia coli 97.0246	329
K5J405	ldhA	Escherichia coli 10.0869	329
F0JR59	ldhA	Escherichia fergusonii ECD227	329
G0DAF5	ldhA	Escherichia coli NA114	329
I2V8T3	ldhA	Escherichia coli JB1-95	329
I2TBF2	ldhA	Escherichia coli 96.0497	329
P52643	ldhA	Escherichia coli (strain K12)	329
F9I1V6	ldhA	Escherichia coli O104:H4 str. C227-11	329
K5IAF5	ldhA	Escherichia coli 88.0221	329
H4VF89	ldhA	Escherichia coli DEC6C	329
I2SLS2	ldhA	Escherichia coli 1.2264	329
I2Z9C5	ldhA	Escherichia coli TW07793	329
K3I497	ldhA	Escherichia coli TW15901	329
I2ZX83	ldhA	Escherichia coli B41	329
K5GJL1	ldhA	Escherichia coli 5.2239	329
K5KHT3	ldhA	Escherichia coli 10.0821	329
G4PWD0	ldhA	Escherichia coli O7:K1 str. CE10	329
I3ADZ0	ldhA	Escherichia coli 900105 (10e)	329
I2XXT1	ldhA	Escherichia coli 3.3884	329
K5GW44	ldhA	Escherichia coli 8.0569	329
H5JH40	ldhA	Escherichia coli DEC12C	329
J7R0U0	ldhA	Escherichia coli chi7122	329
K3IUS0	ldhA	Escherichia coli TW00353	329
K5IAV6	ldhA	Escherichia coli 8.0586	329
K6VZV5	ldhA	Escherichia blattae NBRC 105725	329
I2VLZ8	ldhA	Escherichia coli 96.154	329
K3UH56	ldhA	Escherichia coli 0.1288	329
H5H6H1	ldhA	Escherichia coli DEC11C	329
I2Y0G3	ldhA	Escherichia coli 2.4168	329
K5GLF4	ldhA	Escherichia coli 3.4870	329
C2DRI8	ldhA	Escherichia coli 83972	329
I6G8V3	ldhA	Escherichia coli EPECa12	329
I2VQA4	ldhA	Escherichia coli 5.0959	329
H4U2M5	ldhA	Escherichia coli DEC5E	329
I2YIM9	ldhA	Escherichia coli 3.2303	329
I2X512	ldhA	Escherichia coli 2.3916	329
I2WNJ1	ldhA	Escherichia coli 4.0967	329
H5HNW5	ldhA	Escherichia coli DEC11D	329
I2RMP7	ldhA	Escherichia coli 1.2741	329
H5II34	ldhA	Escherichia coli DEC12A	329
I2WF34	ldhA	Escherichia coli 9.0111	329
K5I4J5	ldhA	Escherichia coli 8.2524	329
All organisms containing sequences corresponding to ldha. ihfa and ihfb
K5I4J5	ldhA	Escherichia coli 8.2524	329
K5I5R2	ihfB	Escherichia coli 8.2524	94
K5ITF4	ihfA	Escherichia coli 8.2524	99
I2WF34	ldhA	Escherichia coli 9.0111	329
I2WDC6	ihfB	Escherichia coli 9.0111	94
I2WE20	ihfA	Escherichia coli 9.0111	99
H5II34	ldhA	Escherichia coli DEC12A	329
H5IGK0	ihfB	Escherichia coli DEC12A	94
H5IJ40	ihfA	Escherichia coli DEC12A	99
I2RMP7	ldhA	Escherichia coli 1.2741	329
I2RAQ5	ihfB	Escherichia coli 1.2741	94
I2RJT9	ihfA	Escherichia coli 1.2741	99
H5HNW5	ldhA	Escherichia coli DEC11D	329
H5HMB1	ihfB	Escherichia coli DEC11D	94
H5HPQ7	ihfA	Escherichia coli DEC11D	99
I2WNJ1	ldhA	Escherichia coli 4.0967	329
I2WVW0	ihfB	Escherichia coli 4.0967	94
I2WU31	ihfA	Escherichia coli 4.0967	99
I2X512	ldhA	Escherichia coli 2.3916	329
I2XCJ0	ihfB	Escherichia coli 2.3916	94
I2XEK6	ihfA	Escherichia coli 2.3916	99
I2YIM9	ldhA	Escherichia coli 3.2303	329
I2YP14	ihfB	Escherichia coli 3.2303	94
I2YN36	ihfA	Escherichia coli 3.2303	99
H4U2M5	ldhA	Escherichia coli DEC5E	329
H4TZR6	ihfB	Escherichia coli DEC5E	94
H4U234	ihfA	Escherichia coli DEC5E	99
I2VQA4	ldhA	Escherichia coli 5.0959	329
I2VWK4	ihfB	Escherichia coli 5.0959	94
I2VRX7	ihfA	Escherichia coli 5.0959	99
I6G8V3	ldhA	Escherichia coli EPECa12	329
I6GDJ4	ihfB	Escherichia coli EPECa12	94
I6G731	ihfA	Escherichia coli EPECa12	99
C2DRI8	ldhA	Escherichia coli 83972	329
C2DKG1	ihfB	Escherichia coli 83972	94
C2DQF4	ihfA	Escherichia coli 83972	99
K5GLF4	ldhA	Escherichia coli 3.4870	329
K5FSG0	ihfB	Escherichia coli 3.4870	94
K5FRJ3	ihfA	Escherichia coli 3.4870	99
I2Y0G3	ldhA	Escherichia coli 2.4168	329
I2Y310	ihfB	Escherichia coli 2.4168	94
I2Y754	ihfA	Escherichia coli 2.4168	99
H5H6H1	ldhA	Escherichia coli DEC11C	329
H5H4M3	ihfB	Escherichia coli DEC11C	94
H5H7K8	ihfA	Escherichia coli DEC11C	99
K3UH56	ldhA	Escherichia coli 0.1288	329
K3VFG7	ihfB	Escherichia coli 0.1288	94
K3UF84	ihfA	Escherichia coli 0.1288	99
I2VLZ8	ldhA	Escherichia coli 96.154	329
I2VDM5	ihfB	Escherichia coli 96.154	94
I2VFZ8	ihfA	Escherichia coli 96.154	99
K6VZV5	ldhA	Escherichia blattae NBRC 105725	329
K6VSU0	ihfB	Escherichia blattae NBRC 105725	94
K6VDE1	ihfA	Escherichia blattae NBRC 105725	99
K5IAV6	ldhA	Escherichia coli 8.0586	329
K5H2G7	ihfB	Escherichia coli 8.0586	94
K5HFE6	ihfA	Escherichia coli 8.0586	99
K3IUS0	ldhA	Escherichia coli TW00353	329
K3JNF0	ihfB	Escherichia coli TW00353	94
K3IS28	ihfA	Escherichia coli TW00353	99
J7R0U0	ldhA	Escherichia coli chi7122	329
J7RRY3	himD	Escherichia coli chi7122	94
J7QLS3	himA	Escherichia coli chi7122	99
H5JH40	ldhA	Escherichia coli DEC12C	329
H5JFI3	ihfB	Escherichia coli DEC12C	94
H5JI64	ihfA	Escherichia coli DEC12C	99
K5GW44	ldhA	Escherichia coli 8.0569	329
K5HA26	ihfB	Escherichia coli 8.0569	94
K5H449	ihfA	Escherichia coli 8.0569	99
I2XXT1	ldhA	Escherichia coli 3.3884	329
H9UQH6	ihfB	Escherichia coli P12b	94
H9URU3	ihfA	Escherichia coli P12b	99
H5MS51	ldhA	Escherichia coli DEC14A	329
H5MSS3	ihfB	Escherichia coli DEC14A	94
H5MUM7	ihfA	Escherichia coli DEC14A	99
I2UG64	ldhA	Escherichia coli 4.0522	329
I2ULY6	ihfB	Escherichia coli 4.0522	94
I2UIH6	ihfA	Escherichia coli 4.0522	99
H4WQI6	ldhA	Escherichia coli DEC7A	329
H4WP01	ihfB	Escherichia coli DEC7A	94
H4WRJ8	ihfA	Escherichia coli DEC7A	99
C3TB72	ldhA	Escherichia coli	329
Q14F22	ihfB	Escherichia coli	94
Q14F23	ihfA	Escherichia coli	99
E0IUJ5	ldhA	Escherichia coli (strain ATCC 9637 / CCM 2024 / DSM 1116 / NCIMB 8666 / NRRL B-766 / W)	329
E0IZD0	ihfB	Escherichia coli (strain ATCC 9637 / CCM 2024 / DSM 1116 / NCIMB 8666 / NRRL B-766 / W)	94
E0IXI4	ihfA	Escherichia coli (strain ATCC 9637 / CCM 2024 / DSM 1116 / NCIMB 8666 / NRRL B-766 / W)	99
C6EEW4	ldhA	Escherichia coli (strain B / BL21-DE3)	329
C6EI70	ihfB	Escherichia coli (strain B / BL21-DE3)	94
C6ECP5	himA	Escherichia coli (strain B / BL21-DE3)	99
Q8X9Q7	ldhA	Escherichia coli O157:H7	329
P0A6Y3	ihfB	Escherichia coli O157:H7	94
P0A6X9	ihfA	Escherichia coli O157:H7	99
C9QWX5	ldhA	Escherichia coli (strain ATCC 33849 / DSM 4235 / NCIB 12045 / K12 / DH1)	329
C9QZU0	ihfB	Escherichia coli (strain ATCC 33849 / DSM 4235 / NCIB 12045 / K12 / DH1)	94
C9QTZ5	ihfA	Escherichia coli (strain ATCC 33849 / DSM 4235 / NCIB 12045 / K12 / DH1)	99
E8YAP1	ldhA	Escherichia coli (strain ATCC 55124 / KO11)	329
E8Y3L1	ihfB	Escherichia coli (strain ATCC 55124 / KO11)	94
E8Y6R3	ihfA	Escherichia coli (strain ATCC 55124 / KO11)	99
B7N4F9	ldhA	Escherichia coli O17:K52:H18 (strain UMN026 / ExPEC)	329
B7NAR1	ihfB	Escherichia coli O17:K52:H18 (strain UMN026 / ExPEC)	94
B7N550	ihfA	Escherichia coli O17:K52:H18 (strain UMN026 / ExPEC)	99
D5D2D6	ldhA	Escherichia coli O18:K1:H7 (strain IHE3034 / ExPEC)	329
D5CYV8	ihfB	Escherichia coli O18:K1:H7 (strain IHE3034 / ExPEC)	94
D5D3H8	ihfA	Escherichia coli O18:K1:H7 (strain IHE3034 / ExPEC)	99
C4ZVC3	ldhA	Escherichia coli (strain K12 / MC4100 / BW2952)	329
C4ZQ38	ihfB	Escherichia coli (strain K12 / MC4100 / BW2952)	94
C4ZYH4	ihfA	Escherichia coli (strain K12 / MC4100 / BW2952)	99
B7MUJ6	ldhA	Escherichia coli O81 (strain ED1a)	329
B7MS27	ihfB	Escherichia coli O81 (strain ED1a)	94
B7MVJ1	ihfA	Escherichia coli O81 (strain ED1a)	99
D3QSG5	ldhA	Escherichia coli O55:H7 (strain CB9615 / EPEC)	329
D3QPA9	ihfB	Escherichia coli O55:H7 (strain CB9615 / EPEC)	94
D3QUQ6	ihfA	Escherichia coli O55:H7 (strain CB9615 / EPEC)	99
D3H4J0	ldhA	Escherichia coli O44:H18 (strain 042 / EAEC)	329
D3H0E1	ihfB	Escherichia coli O44:H18 (strain 042 / EAEC)	94
D3GUK3	ihfA	Escherichia coli O44:H18 (strain 042 / EAEC)	99
B7URF5	ldhA	Escherichia coli O127:H6 (strain E2348/69 / EPEC)	329
G7RAU5	ihfB	Escherichia coli (strain 'clone D i2')	94
G7R7G5	ihfA	Escherichia coli (strain 'clone D i2')	99
B7LRU2	ldhA	Escherichia fergusonii (strain ATCC 35469 / DSM 13698 / CDC 0568-73)	329
B7LN74	ihfB	Escherichia fergusonii (strain ATCC 35469 / DSM 13698 / CDC 0568-73)	94
B7LQ77	ihfA	Escherichia fergusonii (strain ATCC 35469 / DSM 13698 / CDC 0568-73)	99
Q1RC13	ldhA	Escherichia coli (strain UTI89 / UPEC)	329
Q1RDU6	ihfB	Escherichia coli (strain UTI89 / UPEC)	94
Q1RB83	ihfA	Escherichia coli (strain UTI89 / UPEC)	99
C8U864	ldhA	Escherichia coli O103:H2 (strain 12009 / EHEC)	329
C8U4J2	ihfB	Escherichia coli O103:H2 (strain 12009 / EHEC)	94
C8U9X7	ihfA	Escherichia coli O103:H2 (strain 12009 / EHEC)	99
G7RRJ0	ldhA	Escherichia coli (strain 'clone D i14')	329
B7MAS3	ihfA	Escherichia coli O45:K1 (strain S88 / ExPEC)	99
B7MHM1	ihfB	Escherichia coli O45:K1 (strain S88 / ExPEC)	94
B7MM29	ldhA	Escherichia coli O45:K1 (strain S88 / ExPEC)	329
C8UBG8	ihfA	Escherichia coli O111:H- (strain 11128 / EHEC)	99
C8ULD5	ihfB	Escherichia coli O111:H- (strain 11128 / EHEC)	94
C8UPI4	ldhA	Escherichia coli O111:H- (strain 11128 / EHEC)	329
C6UW52	ihfA	Escherichia coli O157:H7 (strain TW14359 / EHEC)	99
C6UNH7	ihfB	Escherichia coli O157:H7 (strain TW14359 / EHEC)	94
C6UTJ9	ldhA	Escherichia coli O157:H7 (strain TW14359 / EHEC)	329
A1AB14	ldhA	Escherichia coli O1:K1 / APEC	329
G7RFZ0	ihfA	Escherichia coli (strain 'clone D i14')	99
G7RJB0	ihfB	Escherichia coli (strain 'clone D i14')	94
G7R4N4	ldhA	Escherichia coli (strain 'clone D i2')	329
B7L6I5	ihfA	Escherichia coli (strain 55989 / EAEC)	99
B7LDA4	ihfB	Escherichia coli (strain 55989 / EAEC)	94
B7L5B8	ldhA	Escherichia coli (strain 55989 / EAEC)	329
P0A6X8	ihfA	Escherichia coli O6:H1 (strain CFT073 / ATCC 700928 / UPEC)	99
P0A6Y2	ihfB	Escherichia coli O6:H1 (strain CFT073 / ATCC 700928 / UPEC)	94
Q8FHN9	ldhA	Escherichia coli O6:H1 (strain CFT073 / ATCC 700928 / UPEC)	329
B7NT64	ihfA	Escherichia coli O7:K1 (strain IAI39 / ExPEC)	99
B7NM62	ihfB	Escherichia coli O7:K1 (strain IAI39 / ExPEC)	94
B7NHQ6	ldhA	Escherichia coli O7:K1 (strain IAI39 / ExPEC)	329
B1XG19	ihfA	Escherichia coli (strain K12 / DH10B)	99
B1X852	ihfB	Escherichia coli (strain K12 / DH10B)	94
B1XD95	ldhA	Escherichia coli (strain K12 / DH10B)	329
C8TSM9	ihfA	Escherichia coli O26:H11 (strain 11368 / EHEC)	99
C8TM27	ihfB	Escherichia coli O26:H11 (strain 11368 / EHEC)	94
C8TRB2	ldhA	Escherichia coli O26:H11 (strain 11368 / EHEC)	329
C6UJ28	ihfA	Escherichia coli (strain B / REL606)	99
C6UEP7	himD	Escherichia coli (strain B / REL606)	94
C6UH22	ldhA	Escherichia coli (strain B / REL606)	329
B7M1C1	ihfA	Escherichia coli O8 (strain IAI1)	99
B7M841	ihfB	Escherichia coli O8 (strain IAI1)	94
B7LYM1	ldhA	Escherichia coli O8 (strain IAI1)	329
B7US95	ihfA	Escherichia coli O127:H6 (strain E2348/69 / EPEC)	99
B7UMZ8	ihfB	Escherichia coli O127:H6 (strain E2348/69 / EPEC)	94
H9USV4	ldhA	Escherichia coli P12b	329
H4K393	ihfA	Escherichia coli DEC2A	99
H4K0P3	ihfB	Escherichia coli DEC2A	94
H4K293	ldhA	Escherichia coli DEC2A	329
H5UYQ3	ihfA	Escherichia hermannii NBRC 105704	99
H5UX29	ihfB	Escherichia hermannii NBRC 105704	94
H5V5C6	ldhA	Escherichia hermannii NBRC 105704	329
H4VWH9	ihfA	Escherichia coli DEC6D	99
H4VU19	ihfB	Escherichia coli DEC6D	94
H4VVK0	ldhA	Escherichia coli DEC6D	329
H5I3Z4	ihfA	Escherichia coli DEC11E	99
H5I1Z9	ihfB	Escherichia coli DEC11E	94
H5I351	ldhA	Escherichia coli DEC11E	329
I2TUH4	ihfA	Escherichia coli 3.2608	99
I2TVS0	ihfB	Escherichia coli 3.2608	94
I2TTS9	ldhA	Escherichia coli 3.2608	329
H4J8Q1	ihfA	Escherichia coli DEC1D	99
H4J5S4	ihfB	Escherichia coli DEC1D	94
H4J7P4	ldhA	Escherichia coli DEC1D	329
I2YXK2	ihfA	Escherichia coli 3003	99
I2YYP6	ihfB	Escherichia coli 3003	94
I2YVX1	ldhA	Escherichia coli 3003	329
K5H1J0	ihfA	Escherichia coli 8.0566	99
K5H7L0	ihfB	Escherichia coli 8.0566	94
K5H642	ldhA	Escherichia coli 8.0566	329
I2SIG0	ihfA	Escherichia coli 5.0588	99
I2SJX4	ihfB	Escherichia coli 5.0588	94
I2S7Y5	ldhA	Escherichia coli 5.0588	329
H4YWC2	ihfA	Escherichia coli DEC8A	99
H4YTT7	ihfB	Escherichia coli DEC8A	94
H4YVM1	ldhA	Escherichia coli DEC8A	329
H4YG40	ihfA	Escherichia coli DEC7E	99
H4YDK2	ihfB	Escherichia coli DEC7E	94
H4YEF8	ldhA	Escherichia coli DEC7E	329
I2TW94	ihfA	Escherichia coli 93.0624	99
I2U7Z3	ihfB	Escherichia coli 93.0624	94
I2U6X7	ldhA	Escherichia coli 93.0624	329
H4UJR7	ihfA	Escherichia coli DEC6A	99
H4UGG0	ihfB	Escherichia coli DEC6A	94
H4UIM6	ldhA	Escherichia coli DEC6A	329
I2S305	ihfA	Escherichia coli 97.0246	99
I2S5K6	ihfB	Escherichia coli 97.0246	94
I2S2Z7	ldhA	Escherichia coli 97.0246	329
K5IY95	ihfA	Escherichia coli 10.0869	99
K5IH84	ihfB	Escherichia coli 10.0869	94
K5J405	ldhA	Escherichia coli 10.0869	329
F0JND5	ihfA	Escherichia fergusonii ECD227	99
F0JL82	ihfB	Escherichia fergusonii ECD227	94
F0JR59	ldhA	Escherichia fergusonii ECD227	329
G0DD82	ihfA	Escherichia coli NA114	99
G0D5C6	himD	Escherichia coli NA114	94
G0DAF5	ldhA	Escherichia coli NA114	329
I2V898	ihfA	Escherichia coli JB1-95	99
I2V2Y5	ihfB	Escherichia coli JB1-95	94
I2V8T3	ldhA	Escherichia coli JB1-95	329
I2TBN0	ihfA	Escherichia coli 96.0497	99
I2TDN9	ihfB	Escherichia coli 96.0497	94
I2TBF2	ldhA	Escherichia coli 96.0497	329
P0A6X7	ihfA	Escherichia coli (strain K12)	99
P0A6Y1	ihfB	Escherichia coli (strain K12)	94
P52643	ldhA	Escherichia coli (strain K12)	329
F9HXQ7	himA	Escherichia coli O104:H4 str. C227-11	99
F9HTD3	himD	Escherichia coli O104:H4 str. C227-11	94
F9I1V6	ldhA	Escherichia coli O104:H4 str. C227-11	329
K5JYH4	ihfA	Escherichia coli 88.0221	99
K5JV41	ihfB	Escherichia coli 88.0221	94
K5IAF5	ldhA	Escherichia coli 88.0221	329
H4VGI0	ihfA	Escherichia coli DEC6C	99
H4VDN0	ihfB	Escherichia coli DEC6C	94
H4VF89	ldhA	Escherichia coli DEC6C	329
I2SSU1	ihfA	Escherichia coli 1.2264	99
I2SZK9	ihfB	Escherichia coli 1.2264	94
I2SLS2	ldhA	Escherichia coli 1.2264	329
I2ZCK5	ihfA	Escherichia coli TW07793	99
I2Z8W6	ihfB	Escherichia coli TW07793	94
I2Z9C5	ldhA	Escherichia coli TW07793	329
K3IUE3	ihfA	Escherichia coli TW15901	99
K3I7F0	ihfB	Escherichia coli TW15901	94
K3I497	ldhA	Escherichia coli TW15901	329
I2ZPG7	ihfA	Escherichia coli B41	99
I2ZX08	ihfB	Escherichia coli B41	94
I2ZX83	ldhA	Escherichia coli B41	329
K5FPL4	ihfA	Escherichia coli 5.2239	99
K5EYP8	ihfB	Escherichia coli 5.2239	94
K5GJL1	ldhA	Escherichia coli 5.2239	329
K5K4C6	ihfA	Escherichia coli 10.0821	99
K5KA33	ihfB	Escherichia coli 10.0821	94
K5KHT3	ldhA	Escherichia coli 10.0821	329
G4Q0R1	ihfA	Escherichia coli O7:K1 str. CE10	99
G4PNW6	himD	Escherichia coli O7:K1 str. CE10	94
G4PWD0	ldhA	Escherichia coli O7:K1 str. CE10	329
I3A2V8	ihfA	Escherichia coli 900105 (10e)	99
I3ACY8	ihfB	Escherichia coli 900105 (10e)	94
I3ADZ0	ldhA	Escherichia coli 900105 (10e)	329
I2XY67	ihfA	Escherichia coli 3.3884	99
I2XVC9	ihfB	Escherichia coli 3.3884	94
All organisms containign sequences corresponding to ldha, ihfa, ihfb, fnr
I2XVC9	ihfB	Escherichia coli 3.3884	94
I2XY67	ihfA	Escherichia coli 3.3884	99
I3ADZ0	ldhA	Escherichia coli 900105 (10e)	329
I3ACY8	ihfB	Escherichia coli 900105 (10e)	94
I3A2V8	ihfA	Escherichia coli 900105 (10e)	99
I3A546	fnr	Escherichia coli 900105 (10e)	250
G4PWD0	ldhA	Escherichia coli O7:K1 str. CE10	329
G4PNW6	himD	Escherichia coli O7:K1 str. CE10	94
G4Q0R1	ihfA	Escherichia coli O7:K1 str. CE10	99
G4PWB1	fnr	Escherichia coli O7:K1 str. CE10	250
K5KHT3	ldhA	Escherichia coli 10.0821	329
K5KA33	ihfB	Escherichia coli 10.0821	94
K5K4C6	ihfA	Escherichia coli 10.0821	99
K5KJA9	fnr	Escherichia coli 10.0821	250
K5GJL1	ldhA	Escherichia coli 5.2239	329
K5EYP8	ihfB	Escherichia coli 5.2239	94
K5FPL4	ihfA	Escherichia coli 5.2239	99
K5EPY7	fnr	Escherichia coli 5.2239	250
I2ZX83	ldhA	Escherichia coli B41	329
I2ZX08	ihfB	Escherichia coli B41	94
I2ZPG7	ihfA	Escherichia coli B41	99
I2ZWE5	fnr	Escherichia coli B41	250
K3I497	ldhA	Escherichia coli TW15901	329
K3I7F0	ihfB	Escherichia coli TW15901	94
K3IUE3	ihfA	Escherichia coli TW15901	99
K3IW44	fnr	Escherichia coli TW15901	250
I2Z9C5	ldhA	Escherichia coli TW07793	329
I2Z8W6	ihfB	Escherichia coli TW07793	94
I2ZCK5	ihfA	Escherichia coli TW07793	99
I2Z832	fnr	Escherichia coli TW07793	250
I2SLS2	ldhA	Escherichia coli 1.2264	329
I2SZK9	ihfB	Escherichia coli 1.2264	94
I2SSU1	ihfA	Escherichia coli 1.2264	99
I2SMN0	fnr	Escherichia coli 1.2264	250
H4VF89	ldhA	Escherichia coli DEC6C	329
H4VDN0	ihfB	Escherichia coli DEC6C	94
H4VGI0	ihfA	Escherichia coli DEC6C	99
H4VF68	fnr	Escherichia coli DEC6C	250
K5IAF5	ldhA	Escherichia coli 88.0221	329
K5JV41	ihfB	Escherichia coli 88.0221	94
K5JYH4	ihfA	Escherichia coli 88.0221	99
K5K536	fnr	Escherichia coli 88.0221	250
F9I1V6	ldhA	Escherichia coli O104:H4 str. C227-11	329
F9HTD3	himD	Escherichia coli O104:H4 str. C227-11	94
F9HXQ7	himA	Escherichia coli O104:H4 str. C227-11	99
P52643	ldhA	Escherichia coli (strain K12)	329
P0A6Y1	ihfB	Escherichia coli (strain K12)	94
P0A6X7	ihfA	Escherichia coli (strain K12)	99
P0A9E5	fnr	Escherichia coli (strain K12)	250
I2TBF2	ldhA	Escherichia coli 96.0497	329
I2TDN9	ihfB	Escherichia coli 96.0497	94
I2TBN0	ihfA	Escherichia coli 96.0497	99
I2T873	fnr	Escherichia coli 96.0497	250
I2V8T3	ldhA	Escherichia coli JB1-95	329
I2V2Y5	ihfB	Escherichia coli JB1-95	94
I2V898	ihfA	Escherichia coli JB1-95	99
I2V8G0	fnr	Escherichia coli JB1-95	250
G0DAF5	ldhA	Escherichia coli NA114	329
G0D5C6	himD	Escherichia coli NA114	94
G0DD82	ihfA	Escherichia coli NA114	99
F0JR59	ldhA	Escherichia fergusonii ECD227	329
F0JL82	ihfB	Escherichia fergusonii ECD227	94
F0JND5	ihfA	Escherichia fergusonii ECD227	99
F0JRT8	fnr	Escherichia fergusonii ECD227	250
K5J405	ldhA	Escherichia coli 10.0869	329
K5IH84	ihfB	Escherichia coli 10.0869	94
K5IY95	ihfA	Escherichia coli 10.0869	99
K5HZD8	fnr	Escherichia coli 10.0869	250
I2S2Z7	ldhA	Escherichia coli 97.0246	329
I2S5K6	ihfB	Escherichia coli 97.0246	94
I2S305	ihfA	Escherichia coli 97.0246	99
I2RUM8	fnr	Escherichia coli 97.0246	250
H4UIM6	ldhA	Escherichia coli DEC6A	329
H4UGG0	ihfB	Escherichia coli DEC6A	94
H4UJR7	ihfA	Escherichia coli DEC6A	99
H4UIK9	fnr	Escherichia coli DEC6A	250
I2U6X7	ldhA	Escherichia coli 93.0624	329
I2U7Z3	ihfB	Escherichia coli 93.0624	94
I2TW94	ihfA	Escherichia coli 93.0624	99
I2U704	fnr	Escherichia coli 93.0624	250
H4YEF8	ldhA	Escherichia coli DEC7E	329
H4YDK2	ihfB	Escherichia coli DEC7E	94
H4YG40	ihfA	Escherichia coli DEC7E	99
H4YF13	fnr	Escherichia coli DEC7E	250
H4YVM1	ldhA	Escherichia coli DEC8A	329
H4YTT7	ihfB	Escherichia coli DEC8A	94
H4YWC2	ihfA	Escherichia coli DEC8A	99
H4YVE7	fnr	Escherichia coli DEC8A	250
I2S7Y5	ldhA	Escherichia coli 5.0588	329
I2SJX4	ihfB	Escherichia coli 5.0588	94
I2SIG0	ihfA	Escherichia coli 5.0588	99
I2SBA7	fnr	Escherichia coli 5.0588	250
K5H642	ldhA	Escherichia coli 8.0566	329
K5H7L0	ihfB	Escherichia coli 8.0566	94
K5H1J0	ihfA	Escherichia coli 8.0566	99
K5HWA5	fnr	Escherichia coli 8.0566	250
I2YVX1	ldhA	Escherichia coli 3003	329
I2YYP6	ihfB	Escherichia coli 3003	94
I2YXK2	ihfA	Escherichia coli 3003	99
I2YX41	fnr	Escherichia coli 3003	250
H4J7P4	ldhA	Escherichia coli DEC1D	329
H4J5S4	ihfB	Escherichia coli DEC1D	94
H4J8Q1	ihfA	Escherichia coli DEC1D	99
H4J7M2	fnr	Escherichia coli DEC1D	250
I2TTS9	ldhA	Escherichia coli 3.2608	329
I2TVS0	ihfB	Escherichia coli 3.2608	94
I2TUH4	ihfA	Escherichia coli 3.2608	99
I2TSS7	fnr	Escherichia coli 3.2608	250
H5I351	ldhA	Escherichia coli DEC11E	329
H5I1Z9	ihfB	Escherichia coli DEC11E	94
H5I3Z4	ihfA	Escherichia coli DEC11E	99
H5I335	fnr	Escherichia coli DEC11E	250
H4VVK0	ldhA	Escherichia coli DEC6D	329
H4VU19	ihfB	Escherichia coli DEC6D	94
H4VWH9	ihfA	Escherichia coli DEC6D	99
H4VVI2	fnr	Escherichia coli DEC6D	250
H5V5C6	ldhA	Escherichia hermannii NBRC 105704	329
H5UX29	ihfB	Escherichia hermannii NBRC 105704	94
H5UYQ3	ihfA	Escherichia hermannii NBRC 105704	99
H5V242	fnr	Escherichia hermannii NBRC 105704	250
H4K293	ldhA	Escherichia coli DEC2A	329
H4K0P3	ihfB	Escherichia coli DEC2A	94
H4K393	ihfA	Escherichia coli DEC2A	99
H4K272	fnr	Escherichia coli DEC2A	250
H9USV4	ldhA	Escherichia coli P12b	329
B7UMZ8	ihfB	Escherichia coli O127:H6 (strain E2348/69 / EPEC)	94
B7US95	ihfA	Escherichia coli O127:H6 (strain E2348/69 / EPEC)	99
B7LYM1	ldhA	Escherichia coli O8 (strain IAI1)	329
B7M841	ihfB	Escherichia coli O8 (strain IAI1)	94
B7M1C1	ihfA	Escherichia coli O8 (strain IAI1)	99
B7LYK3	fnr	Escherichia coli O8 (strain IAI1)	250
C6UH22	ldhA	Escherichia coli (strain B / REL606)	329
C6UEP7	himD	Escherichia coli (strain B / REL606)	94
C6UJ28	ihfA	Escherichia coli (strain B / REL606)	99
C6UGY1	fnr	Escherichia coli (strain B / REL606)	250
C8TRB2	ldhA	Escherichia coli O26:H11 (strain 11368 / EHEC)	329
C8TM27	ihfB	Escherichia coli O26:H11 (strain 11368 / EHEC)	94
C8TSM9	ihfA	Escherichia coli O26:H11 (strain 11368 / EHEC)	99
C8TR34	fnr	Escherichia coli O26:H11 (strain 11368 / EHEC)	250
B1XD95	ldhA	Escherichia coli (strain K12 / DH10B)	329
B1X852	ihfB	Escherichia coli (strain K12 / DH10B)	94
B1XG19	ihfA	Escherichia coli (strain K12 / DH10B)	99
B1XCG3	fnr	Escherichia coli (strain K12 / DH10B)	250
B7NHQ6	ldhA	Escherichia coli O7:K1 (strain IAI39 / ExPEC)	329
B7NM62	ihfB	Escherichia coli O7:K1 (strain IAI39 / ExPEC)	94
B7NT64	ihfA	Escherichia coli O7:K1 (strain IAI39 / ExPEC)	99
B7NHN4	fnr	Escherichia coli O7:K1 (strain IAI39 / ExPEC)	250
Q8FHN9	ldhA	Escherichia coli O6:H1 (strain CFT073 / ATCC 700928 / UPEC)	329
P0A6Y2	ihfB	Escherichia coli O6:H1 (strain CFT073 / ATCC 700928 / UPEC)	94
P0A6X8	ihfA	Escherichia coli O6:H1 (strain CFT073 / ATCC 700928 / UPEC)	99
P0A9E6	fnr	Escherichia coli O6:H1 (strain CFT073 / ATCC 700928 / UPEC)	250
B7L5B8	ldhA	Escherichia coli (strain 55989 / EAEC)	329
B7LDA4	ihfB	Escherichia coli (strain 55989 / EAEC)	94
B7L6I5	ihfA	Escherichia coli (strain 55989 / EAEC)	99
H9URU3	ihfA	Escherichia coli P12b	99
H9UQH6	ihfB	Escherichia coli P12b	94
I2XXT1	ldhA	Escherichia coli 3.3884	329
I2XXJ9	fnr	Escherichia coli 3.3884	250
K5H449	ihfA	Escherichia coli 8.0569	99
K5HA26	ihfB	Escherichia coli 8.0569	94
K5GW44	ldhA	Escherichia coli 8.0569	329
K5HXY5	fnr	Escherichia coli 8.0569	250
H5JI64	ihfA	Escherichia coli DEC12C	99
H5JFI3	ihfB	Escherichia coli DEC12C	94
H5JH40	ldhA	Escherichia coli DEC12C	329
H5JH22	fnr	Escherichia coli DEC12C	250
J7QLS3	himA	Escherichia coli chi7122	99
J7RRY3	himD	Escherichia coli chi7122	94
J7R0U0	ldhA	Escherichia coli chi7122	329
J7QL32	fnr	Escherichia coli chi7122	250
K3IS28	ihfA	Escherichia coli TW00353	99
K3JNF0	ihfB	Escherichia coli TW00353	94
K3IUS0	ldhA	Escherichia coli TW00353	329
K3IT74	fnr	Escherichia coli TW00353	250
K5HFE6	ihfA	Escherichia coli 8.0586	99
K5H2G7	ihfB	Escherichia coli 8.0586	94
K5IAV6	ldhA	Escherichia coli 8.0586	329
K5HA16	fnr	Escherichia coli 8.0586	250
K6VDE1	ihfA	Escherichia blattae NBRC 105725	99
K6VSU0	ihfB	Escherichia blattae NBRC 105725	94
K6VZV5	ldhA	Escherichia blattae NBRC 105725	329
K6UQV9	fnr	Escherichia blattae NBRC 105725	250
I2VFZ8	ihfA	Escherichia coli 96.154	99
I2VDM5	ihfB	Escherichia coli 96.154	94
I2VLZ8	ldhA	Escherichia coli 96.154	329
I2VHC8	fnr	Escherichia coli 96.154	250
K3UF84	ihfA	Escherichia coli 0.1288	99
K3VFG7	ihfB	Escherichia coli 0.1288	94
K3UH56	ldhA	Escherichia coli 0.1288	329
K3UK98	fnr	Escherichia coli 0.1288	250
H5H7K8	ihfA	Escherichia coli DEC11C	99
H5H4M3	ihfB	Escherichia coli DEC11C	94
H5H6H1	ldhA	Escherichia coli DEC11C	329
H5H6F3	fnr	Escherichia coli DEC11C	250
I2Y754	ihfA	Escherichia coli 2.4168	99
I2Y310	ihfB	Escherichia coli 2.4168	94
I2Y0G3	ldhA	Escherichia coli 2.4168	329
I2Y254	fnr	Escherichia coli 2.4168	250
K5FRJ3	ihfA	Escherichia coli 3.4870	99
K5FSG0	ihfB	Escherichia coli 3.4870	94
K5GLF4	ldhA	Escherichia coli 3.4870	329
K5FWI9	fnr	Escherichia coli 3.4870	250
I2WU31	ihfA	Escherichia coli 4.0967	99
I2WVW0	ihfB	Escherichia coli 4.0967	94
I2WNJ1	ldhA	Escherichia coli 4.0967	329
I2WNH3	fnr	Escherichia coli 4.0967	250
H5HPQ7	ihfA	Escherichia coli DEC11D	99
H5HMB1	ihfB	Escherichia coli DEC11D	94
H5HNW5	ldhA	Escherichia coli DEC11D	329
H5HNU8	fnr	Escherichia coli DEC11D	250
I2RJT9	ihfA	Escherichia coli 1.2741	99
I2RAQ5	ihfB	Escherichia coli 1.2741	94
I2RMP7	ldhA	Escherichia coli 1.2741	329
I2RN26	fnr	Escherichia coli 1.2741	250
K5H0K4	fnr	Escherichia coli 8.2524	250
K5I4J5	ldhA	Escherichia coli 8.2524	329
K5I5R2	ihfB	Escherichia coli 8.2524	94
K5ITF4	ihfA	Escherichia coli 8.2524	99
I2WF55	fnr	Escherichia coli 9.0111	250
I2WF34	ldhA	Escherichia coli 9.0111	329
I2WDC6	ihfB	Escherichia coli 9.0111	94
I2WE20	ihfA	Escherichia coli 9.0111	99
H5II16	fnr	Escherichia coli DEC12A	250
H5II34	ldhA	Escherichia coli DEC12A	329
H5IGK0	ihfB	Escherichia coli DEC12A	94
H5IJ40	ihfA	Escherichia coli DEC12A	99
I2XA19	fnr	Escherichia coli 2.3916	250
I2X512	ldhA	Escherichia coli 2.3916	329
I2XCJ0	ihfB	Escherichia coli 2.3916	94
I2XEK6	ihfA	Escherichia coli 2.3916	99
I2YHR8	fnr	Escherichia coli 3.2303	250
I2YIM9	ldhA	Escherichia coli 3.2303	329
I2YP14	ihfB	Escherichia coli 3.2303	94
I2YN36	ihfA	Escherichia coli 3.2303	99
H4U2K7	fnr	Escherichia coli DEC5E	250
H4U2M5	ldhA	Escherichia coli DEC5E	329
H4TZR6	ihfB	Escherichia coli DEC5E	94
H4U234	ihfA	Escherichia coli DEC5E	99
I2VP51	fnr	Escherichia coli 5.0959	250
I2VQA4	ldhA	Escherichia coli 5.0959	329
I2VWK4	ihfB	Escherichia coli 5.0959	94
I2VRX7	ihfA	Escherichia coli 5.0959	99
I6G8T5	fnr	Escherichia coli EPECa12	250
I6G8V3	ldhA	Escherichia coli EPECa12	329
I6GDJ4	ihfB	Escherichia coli EPECa12	94
I6G731	ihfA	Escherichia coli EPECa12	99
C2DRK7	fnr	Escherichia coli 83972	264
C2DRI8	ldhA	Escherichia coli 83972	329
C2DKG1	ihfB	Escherichia coli 83972	94
C2DQF4	ihfA	Escherichia coli 83972	99
H5MS35	fnr	Escherichia coli DEC14A	250
H5MS51	ldhA	Escherichia coli DEC14A	329
H5MSS3	ihfB	Escherichia coli DEC14A	94
H5MUM7	ihfA	Escherichia coli DEC14A	99
I2UFL2	fnr	Escherichia coli 4.0522	250
I2UG64	ldhA	Escherichia coli 4.0522	329
I2ULY6	ihfB	Escherichia coli 4.0522	94
I2UIH6	ihfA	Escherichia coli 4.0522	99
H4WQG9	fnr	Escherichia coli DEC7A	250
H4WQI6	ldhA	Escherichia coli DEC7A	329
H4WP01	ihfB	Escherichia coli DEC7A	94
H4WRJ8	ihfA	Escherichia coli DEC7A	99
C3TBD2	fnr	Escherichia coli	250
C3TB72	ldhA	Escherichia coli	329
Q14F22	ihfB	Escherichia coli	94
Q14F23	ihfA	Escherichia coli	99
E0IUS3	fnr	Escherichia coli (strain ATCC 9637 / CCM 2024 / DSM 1116 / NCIMB 8666 / NRRL B-766 / W)	250
E0IUJ5	ldhA	Escherichia coli (strain ATCC 9637 / CCM 2024 / DSM 1116 / NCIMB 8666 / NRRL B-766 / W)	329
E0IZD0	ihfB	Escherichia coli (strain ATCC 9637 / CCM 2024 / DSM 1116 / NCIMB 8666 / NRRL B-766 / W)	94
E0IXI4	ihfA	Escherichia coli (strain ATCC 9637 / CCM 2024 / DSM 1116 / NCIMB 8666 / NRRL B-766 / W)	99
C6EEW4	ldhA	Escherichia coli (strain B / BL21-DE3)	329
C6EI70	ihfB	Escherichia coli (strain B / BL21-DE3)	94
C6ECP5	himA	Escherichia coli (strain B / BL21-DE3)	99
P0A9E7	fnr	Escherichia coli O157:H7	250
Q8X9Q7	ldhA	Escherichia coli O157:H7	329
P0A6Y3	ihfB	Escherichia coli O157:H7	94
P0A6X9	ihfA	Escherichia coli O157:H7	99
C9QX18	fnr	Escherichia coli (strain ATCC 33849 / DSM 4235 / NCIB 12045 / K12 / DH1)	250
C9QWX5	ldhA	Escherichia coli (strain ATCC 33849 / DSM 4235 / NCIB 12045 / K12 / DH1)	329
C9QZU0	ihfB	Escherichia coli (strain ATCC 33849 / DSM 4235 / NCIB 12045 / K12 / DH1)	94
C9QTZ5	ihfA	Escherichia coli (strain ATCC 33849 / DSM 4235 / NCIB 12045 / K12 / DH1)	99
E8YBJ1	fnr	Escherichia coli (strain ATCC 55124 / KO11)	250
E8YAP1	ldhA	Escherichia coli (strain ATCC 55124 / KO11)	329
E8Y3L1	ihfB	Escherichia coli (strain ATCC 55124 / KO11)	94
E8Y6R3	ihfA	Escherichia coli (strain ATCC 55124 / KO11)	99
B7N4E1	fnr	Escherichia coli O17:K52:H18 (strain UMN026 / ExPEC)	250
B7N4F9	ldhA	Escherichia coli O17:K52:H18 (strain UMN026 / ExPEC)	329
B7NAR1	ihfB	Escherichia coli O17:K52:H18 (strain UMN026 / ExPEC)	94
B7N550	ihfA	Escherichia coli O17:K52:H18 (strain UMN026 / ExPEC)	99
D5D1Y8	fnr	Escherichia coli O18:K1:H7 (strain IHE3034 / ExPEC)	250
D5D2D6	ldhA	Escherichia coli O18:K1:H7 (strain IHE3034 / ExPEC)	329
D5CYV8	ihfB	Escherichia coli O18:K1:H7 (strain IHE3034 / ExPEC)	94
D5D3H8	ihfA	Escherichia coli O18:K1:H7 (strain IHE3034 / ExPEC)	99
C4ZV82	fnr	Escherichia coli (strain K12 / MC4100 / BW2952)	250
C4ZVC3	ldhA	Escherichia coli (strain K12 / MC4100 / BW2952)	329
C4ZQ38	ihfB	Escherichia coli (strain K12 / MC4100 / BW2952)	94
C4ZYH4	ihfA	Escherichia coli (strain K12 / MC4100 / BW2952)	99
B7MUH6	fnr	Escherichia coli O81 (strain ED1a)	250
B7MUJ6	ldhA	Escherichia coli O81 (strain ED1a)	329
B7MS27	ihfB	Escherichia coli O81 (strain ED1a)	94
B7MVJ1	ihfA	Escherichia coli O81 (strain ED1a)	99
D3QS94	fnr	Escherichia coli O55:H7 (strain CB9615 / EPEC)	250
D3QSG5	ldhA	Escherichia coli O55:H7 (strain CB9615 / EPEC)	329
D3QPA9	ihfB	Escherichia coli O55:H7 (strain CB9615 / EPEC)	94
D3QUQ6	ihfA	Escherichia coli O55:H7 (strain CB9615 / EPEC)	99
D3H4B3	fnr	Escherichia coli O44:H18 (strain 042 / EAEC)	250
D3H4J0	ldhA	Escherichia coli O44:H18 (strain 042 / EAEC)	329
D3H0E1	ihfB	Escherichia coli O44:H18 (strain 042 / EAEC)	94
D3GUK3	ihfA	Escherichia coli O44:H18 (strain 042 / EAEC)	99
B7URE2	fnr	Escherichia coli O127:H6 (strain E2348/69 / EPEC)	250
B7URF5	ldhA	Escherichia coli O127:H6 (strain E2348/69 / EPEC)	329
G7R4L5	fnr	Escherichia coli (strain 'clone D i2')	264
G7RAU5	ihfB	Escherichia coli (strain 'clone D i2')	94
G7R7G5	ihfA	Escherichia coli (strain 'clone D i2')	99
B7LRW4	fnr	Escherichia fergusonii (strain ATCC 35469 / DSM 13698 / CDC 0568-73)	250
B7LRU2	ldhA	Escherichia fergusonii (strain ATCC 35469 / DSM 13698 / CDC 0568-73)	329
B7LN74	ihfB	Escherichia fergusonii (strain ATCC 35469 / DSM 13698 / CDC 0568-73)	94
B7LQ77	ihfA	Escherichia fergusonii (strain ATCC 35469 / DSM 13698 / CDC 0568-73)	99
Q1RC31	fnr	Escherichia coli (strain UTI89 / UPEC)	269
Q1RC13	ldhA	Escherichia coli (strain UTI89 / UPEC)	329
Q1RDU6	ihfB	Escherichia coli (strain UTI89 / UPEC)	94
Q1RB83	ihfA	Escherichia coli (strain UTI89 / UPEC)	99
C8U7F2	fnr	Escherichia coli O103:H2 (strain 12009 / EHEC)	250
C8U864	ldhA	Escherichia coli O103:H2 (strain 12009 / EHEC)	329
C8U4J2	ihfB	Escherichia coli O103:H2 (strain 12009 / EHEC)	94
C8U9X7	ihfA	Escherichia coli O103:H2 (strain 12009 / EHEC)	99
G7RRH1	fnr	Escherichia coli (strain 'clone D i14')	264
G7RRJ0	ldhA	Escherichia coli (strain 'clone D i14')	329
B7MM10	fnr	Escherichia coli O45:K1 (strain S88 / ExPEC)	250
B7MAS3	ihfA	Escherichia coli O45:K1 (strain S88 / ExPEC)	99
B7MHM1	ihfB	Escherichia coli O45:K1 (strain S88 / ExPEC)	94
B7MM29	ldhA	Escherichia coli O45:K1 (strain S88 / ExPEC)	329
C8UPD3	fnr	Escherichia coli O111:H- (strain 11128 / EHEC)	250
C8UBG8	ihfA	Escherichia coli O111:H- (strain 11128 / EHEC)	99
C8ULD5	ihfB	Escherichia coli O111:H- (strain 11128 / EHEC)	94
C8UPI4	ldhA	Escherichia coli O111:H- (strain 11128 / EHEC)	329
C6UTI2	fnr	Escherichia coli O157:H7 (strain TW14359 / EHEC)	250
C6UW52	ihfA	Escherichia coli O157:H7 (strain TW14359 / EHEC)	99
C6UNH7	ihfB	Escherichia coli O157:H7 (strain TW14359 / EHEC)	94
C6UTJ9	ldhA	Escherichia coli O157:H7 (strain TW14359 / EHEC)	329
A1AAU6	fnr	Escherichia coli O1:K1 / APEC	264
A1AB14	ldhA	Escherichia coli O1:K1 / APEC	329
G7RFZ0	ihfA	Escherichia coli (strain 'clone D i14')	99
G7RJB0	ihfB	Escherichia coli (strain 'clone D i14')	94
G7R4N4	ldhA	Escherichia coli (strain 'clone D i2')	329
B7L599	fnr	Escherichia coli (strain 55989 / EAEC)	250
All organisms containign sequences corresponding to ldha, ihfa, ihfb, fnr, arca
B7L599	fnr	Escherichia coli (strain 55989 / EAEC)	250
G7R4N4	ldhA	Escherichia coli (strain 'clone D i2')	329
K3IT74	fnr	Escherichia coli TW00353	250
K3IUS0	ldhA	Escherichia coli TW00353	329
K3JNF0	ihfB	Escherichia coli TW00353	94
K3IS28	ihfA	Escherichia coli TW00353	99
J7QL32	fnr	Escherichia coli chi7122	250
J7R0U0	ldhA	Escherichia coli chi7122	329
J7RRY3	himD	Escherichia coli chi7122	94
J7QLS3	himA	Escherichia coli chi7122	99
J7R9U6	arcA	Escherichia coli chi7122	238
H5JH22	fnr	Escherichia coli DEC12C	250
H5JH40	ldhA	Escherichia coli DEC12C	329
H5JFI3	ihfB	Escherichia coli DEC12C	94
H5JI64	ihfA	Escherichia coli DEC12C	99
K5HXY5	fnr	Escherichia coli 8.0569	250
K5GW44	ldhA	Escherichia coli 8.0569	329
K5HA26	ihfB	Escherichia coli 8.0569	94
K5H449	ihfA	Escherichia coli 8.0569	99
I2XXJ9	fnr	Escherichia coli 3.3884	250
I2XXT1	ldhA	Escherichia coli 3.3884	329
H9UQH6	ihfB	Escherichia coli P12b	94
H9URU3	ihfA	Escherichia coli P12b	99
B7L6I5	ihfA	Escherichia coli (strain 55989 / EAEC)	99
B7LDA4	ihfB	Escherichia coli (strain 55989 / EAEC)	94
B7L5B8	ldhA	Escherichia coli (strain 55989 / EAEC)	329
B7LEP7	arcA	Escherichia coli (strain 55989 / EAEC)	238
P0A9E6	fnr	Escherichia coli O6:H1 (strain CFT073 / ATCC 700928 / UPEC)	250
P0A6X8	ihfA	Escherichia coli O6:H1 (strain CFT073 / ATCC 700928 / UPEC)	99
P0A6Y2	ihfB	Escherichia coli O6:H1 (strain CFT073 / ATCC 700928 / UPEC)	94
Q8FHN9	ldhA	Escherichia coli O6:H1 (strain CFT073 / ATCC 700928 / UPEC)	329
P0A9Q2	arcA	Escherichia coli O6:H1 (strain CFT073 / ATCC 700928 / UPEC)	238
B7NHN4	fnr	Escherichia coli O7:K1 (strain IAI39 / ExPEC)	250
B7NT64	ihfA	Escherichia coli O7:K1 (strain IAI39 / ExPEC)	99
B7NM62	ihfB	Escherichia coli O7:K1 (strain IAI39 / ExPEC)	94
B7NHQ6	ldhA	Escherichia coli O7:K1 (strain IAI39 / ExPEC)	329
B7NW82	arcA	Escherichia coli O7:K1 (strain IAI39 / ExPEC)	238
B1XCG3	fnr	Escherichia coli (strain K12 / DH10B)	250
B1XG19	ihfA	Escherichia coli (strain K12 / DH10B)	99
B1X852	ihfB	Escherichia coli (strain K12 / DH10B)	94
B1XD95	ldhA	Escherichia coli (strain K12 / DH10B)	329
B1XFL1	arcA	Escherichia coli (strain K12 / DH10B)	238
C8TR34	fnr	Escherichia coli O26:H11 (strain 11368 / EHEC)	250
C8TSM9	ihfA	Escherichia coli O26:H11 (strain 11368 / EHEC)	99
C8TM27	ihfB	Escherichia coli O26:H11 (strain 11368 / EHEC)	94
C8TRB2	ldhA	Escherichia coli O26:H11 (strain 11368 / EHEC)	329
C8TQF4	arcA	Escherichia coli O26:H11 (strain 11368 / EHEC)	238
C6UGY1	fnr	Escherichia coli (strain B / REL606)	250
C6UJ28	ihfA	Escherichia coli (strain B / REL606)	99
C6UEP7	himD	Escherichia coli (strain B / REL606)	94
C6UH22	ldhA	Escherichia coli (strain B / REL606)	329
C6UM21	arcA	Escherichia coli (strain B / REL606)	238
B7LYK3	fnr	Escherichia coli O8 (strain IAI1)	250
B7M1C1	ihfA	Escherichia coli O8 (strain IAI1)	99
B7M841	ihfB	Escherichia coli O8 (strain IAI1)	94
B7LYM1	ldhA	Escherichia coli O8 (strain IAI1)	329
B7LXW5	arcA	Escherichia coli O8 (strain IAI1)	238
B7US95	ihfA	Escherichia coli O127:H6 (strain E2348/69 / EPEC)	99
B7UMZ8	ihfB	Escherichia coli O127:H6 (strain E2348/69 / EPEC)	94
B7URL3	arcA	Escherichia coli O127:H6 (strain E2348/69 / EPEC)	238
H9USV4	ldhA	Escherichia coli P12b	329
H9V0J1	arcA	Escherichia coli P12b	238
H4K272	fnr	Escherichia coli DEC2A	250
H4K393	ihfA	Escherichia coli DEC2A	99
H4K0P3	ihfB	Escherichia coli DEC2A	94
H4K293	ldhA	Escherichia coli DEC2A	329
H5V242	fnr	Escherichia hermannii NBRC 105704	250
H5UYQ3	ihfA	Escherichia hermannii NBRC 105704	99
H5UX29	ihfB	Escherichia hermannii NBRC 105704	94
H5V5C6	ldhA	Escherichia hermannii NBRC 105704	329
H5UZR3	arcA	Escherichia hermannii NBRC 105704	238
H4VVI2	fnr	Escherichia coli DEC6D	250
H4VWH9	ihfA	Escherichia coli DEC6D	99
H4VU19	ihfB	Escherichia coli DEC6D	94
H4VVK0	ldhA	Escherichia coli DEC6D	329
H5I335	fnr	Escherichia coli DEC11E	250
H5I3Z4	ihfA	Escherichia coli DEC11E	99
H5I1Z9	ihfB	Escherichia coli DEC11E	94
H5I351	ldhA	Escherichia coli DEC11E	329
I2TSS7	fnr	Escherichia coli 3.2608	250
I2TUH4	ihfA	Escherichia coli 3.2608	99
I2TVS0	ihfB	Escherichia coli 3.2608	94
I2TTS9	ldhA	Escherichia coli 3.2608	329
H4J7M2	fnr	Escherichia coli DEC1D	250
H4J8Q1	ihfA	Escherichia coli DEC1D	99
H4J5S4	ihfB	Escherichia coli DEC1D	94
H4J7P4	ldhA	Escherichia coli DEC1D	329
I2YX41	fnr	Escherichia coli 3003	250
I2YXK2	ihfA	Escherichia coli 3003	99
I2YYP6	ihfB	Escherichia coli 3003	94
I2YVX1	ldhA	Escherichia coli 3003	329
I2YZI5	arcA	Escherichia coli 3003	406
K5HWA5	fnr	Escherichia coli 8.0566	250
K5H1J0	ihfA	Escherichia coli 8.0566	99
K5H7L0	ihfB	Escherichia coli 8.0566	94
K5H642	ldhA	Escherichia coli 8.0566	329
K5H5I8	arcA	Escherichia coli 8.0566	238
I2SBA7	fnr	Escherichia coli 5.0588	250
P0A9Q1	arcA	Escherichia coli (strain K12)	238
F9HXQ7	himA	Escherichia coli O104:H4 str. C227-11	99
F9HTD3	himD	Escherichia coli O104:H4 str. C227-11	94
F9I1V6	ldhA	Escherichia coli O104:H4 str. C227-11	329
K5K536	fnr	Escherichia coli 88.0221	250
K5JYH4	ihfA	Escherichia coli 88.0221	99
K5JV41	ihfB	Escherichia coli 88.0221	94
K5IAF5	ldhA	Escherichia coli 88.0221	329
H4VF68	fnr	Escherichia coli DEC6C	250
H4VGI0	ihfA	Escherichia coli DEC6C	99
H4VDN0	ihfB	Escherichia coli DEC6C	94
H4VF89	ldhA	Escherichia coli DEC6C	329
I2SMN0	fnr	Escherichia coli 1.2264	250
I2SSU1	ihfA	Escherichia coli 1.2264	99
I2SZK9	ihfB	Escherichia coli 1.2264	94
I2SLS2	ldhA	Escherichia coli 1.2264	329
I2Z832	fnr	Escherichia coli TW07793	250
I2ZCK5	ihfA	Escherichia coli TW07793	99
I2Z8W6	ihfB	Escherichia coli TW07793	94
I2Z9C5	ldhA	Escherichia coli TW07793	329
I2ZAF2	arcA	Escherichia coli TW07793	406
K3IW44	fnr	Escherichia coli TW15901	250
K3IUE3	ihfA	Escherichia coli TW15901	99
K3I7F0	ihfB	Escherichia coli TW15901	94
K5KHT3	ldhA	Escherichia coli 10.0821	329
G4PWB1	fnr	Escherichia coli O7:K1 str. CE10	250
G4Q0R1	ihfA	Escherichia coli O7:K1 str. CE10	99
G4PNW6	himD	Escherichia coli O7:K1 str. CE10	94
G4PWD0	ldhA	Escherichia coli O7:K1 str. CE10	329
G4PRD6	arcA	Escherichia coli O7:K1 str. CE10	406
I3A546	fnr	Escherichia coli 900105 (10e)	250
I3A2V8	ihfA	Escherichia coli 900105 (10e)	99
I3ACY8	ihfB	Escherichia coli 900105 (10e)	94
I3ADZ0	ldhA	Escherichia coli 900105 (10e)	329
I2XY67	ihfA	Escherichia coli 3.3884	99
I2XVC9	ihfB	Escherichia coli 3.3884	94
K5KA33	ihfB	Escherichia coli 10.0821	94
K5K4C6	ihfA	Escherichia coli 10.0821	99
K5KJA9	fnr	Escherichia coli 10.0821	250
K5GJL1	ldhA	Escherichia coli 5.2239	329
K5EYP8	ihfB	Escherichia coli 5.2239	94
K5FPL4	ihfA	Escherichia coli 5.2239	99
K5EPY7	fnr	Escherichia coli 5.2239	250
I2ZX83	ldhA	Escherichia coli B41	329
I2ZX08	ihfB	Escherichia coli B41	94
I2ZPG7	ihfA	Escherichia coli B41	99
I2ZWE5	fnr	Escherichia coli B41	250
K3I497	ldhA	Escherichia coli TW15901	329
P52643	ldhA	Escherichia coli (strain K12)	329
P0A6Y1	ihfB	Escherichia coli (strain K12)	94
P0A6X7	ihfA	Escherichia coli (strain K12)	99
P0A9E5	fnr	Escherichia coli (strain K12)	250
I2TBF2	ldhA	Escherichia coli 96.0497	329
I2TDN9	ihfB	Escherichia coli 96.0497	94
I2TBN0	ihfA	Escherichia coli 96.0497	99
I2T873	fnr	Escherichia coli 96.0497	250
I2V8T3	ldhA	Escherichia coli JB1-95	329
I2V2Y5	ihfB	Escherichia coli JB1-95	94
I2V898	ihfA	Escherichia coli JB1-95	99
I2V8G0	fnr	Escherichia coli JB1-95	250
G0D1V2	arcA	Escherichia coli NA114	238
G0DAF5	ldhA	Escherichia coli NA114	329
G0D5C6	himD	Escherichia coli NA114	94
G0DD82	ihfA	Escherichia coli NA114	99
F0JQK0	arcA	Escherichia fergusonii ECD227	407
F0JR59	ldhA	Escherichia fergusonii ECD227	329
F0JL82	ihfB	Escherichia fergusonii ECD227	94
F0JND5	ihfA	Escherichia fergusonii ECD227	99
F0JRT8	fnr	Escherichia fergusonii ECD227	250
K5J405	ldhA	Escherichia coli 10.0869	329
K5IH84	ihfB	Escherichia coli 10.0869	94
K5IY95	ihfA	Escherichia coli 10.0869	99
K5HZD8	fnr	Escherichia coli 10.0869	250
I2S2Z7	ldhA	Escherichia coli 97.0246	329
I2S5K6	ihfB	Escherichia coli 97.0246	94
I2S305	ihfA	Escherichia coli 97.0246	99
I2RUM8	fnr	Escherichia coli 97.0246	250
H4UIM6	ldhA	Escherichia coli DEC6A	329
H4UGG0	ihfB	Escherichia coli DEC6A	94
H4UJR7	ihfA	Escherichia coli DEC6A	99
H4UIK9	fnr	Escherichia coli DEC6A	250
I2U6X7	ldhA	Escherichia coli 93.0624	329
I2U7Z3	ihfB	Escherichia coli 93.0624	94
I2TW94	ihfA	Escherichia coli 93.0624	99
I2U704	fnr	Escherichia coli 93.0624	250
H4YEF8	ldhA	Escherichia coli DEC7E	329
H4YDK2	ihfB	Escherichia coli DEC7E	94
H4YG40	ihfA	Escherichia coli DEC7E	99
H4YF13	fnr	Escherichia coli DEC7E	250
H4YVM1	ldhA	Escherichia coli DEC8A	329
H4YTT7	ihfB	Escherichia coli DEC8A	94
H4YWC2	ihfA	Escherichia coli DEC8A	99
H4YVE7	fnr	Escherichia coli DEC8A	250
I2S7Y5	ldhA	Escherichia coli 5.0588	329
I2SJX4	ihfB	Escherichia coli 5.0588	94
I2SIG0	ihfA	Escherichia coli 5.0588	99
K5HFE6	ihfA	Escherichia coli 8.0586	99
K5H2G7	ihfB	Escherichia coli 8.0586	94
K5IAV6	ldhA	Escherichia coli 8.0586	329
K5HA16	fnr	Escherichia coli 8.0586	250
K6VK68	arcA	Escherichia blattae NBRC 105725	238
K6VDE1	ihfA	Escherichia blattae NBRC 105725	99
K6VSU0	ihfB	Escherichia blattae NBRC 105725	94
K6VZV5	ldhA	Escherichia blattae NBRC 105725	329
K6UQV9	fnr	Escherichia blattae NBRC 105725	250
I2VFZ8	ihfA	Escherichia coli 96.154	99
I2VDM5	ihfB	Escherichia coli 96.154	94
I2VLZ8	ldhA	Escherichia coli 96.154	329
I2VHC8	fnr	Escherichia coli 96.154	250
K3UF84	ihfA	Escherichia coli 0.1288	99
K3VFG7	ihfB	Escherichia coli 0.1288	94
K3UH56	ldhA	Escherichia coli 0.1288	329
K3UK98	fnr	Escherichia coli 0.1288	250
H5H7K8	ihfA	Escherichia coli DEC11C	99
H5H4M3	ihfB	Escherichia coli DEC11C	94
H5H6H1	ldhA	Escherichia coli DEC11C	329
H5H6F3	fnr	Escherichia coli DEC11C	250
I2Y754	ihfA	Escherichia coli 2.4168	99
I2Y310	ihfB	Escherichia coli 2.4168	94
I2Y0G3	ldhA	Escherichia coli 2.4168	329
I2Y254	fnr	Escherichia coli 2.4168	250
K5FRJ3	ihfA	Escherichia coli 3.4870	99
K5FSG0	ihfB	Escherichia coli 3.4870	94
K5GLF4	ldhA	Escherichia coli 3.4870	329
K5FWI9	fnr	Escherichia coli 3.4870	250
I2WU31	ihfA	Escherichia coli 4.0967	99
I2WVW0	ihfB	Escherichia coli 4.0967	94
I2WNJ1	ldhA	Escherichia coli 4.0967	329
I2WNH3	fnr	Escherichia coli 4.0967	250
H5HPQ7	ihfA	Escherichia coli DEC11D	99
H5HMB1	ihfB	Escherichia coli DEC11D	94
H5HNW5	ldhA	Escherichia coli DEC11D	329
H5HNU8	fnr	Escherichia coli DEC11D	250
I2RJT9	ihfA	Escherichia coli 1.2741	99
I2RAQ5	ihfB	Escherichia coli 1.2741	94
I2RMP7	ldhA	Escherichia coli 1.2741	329
I2RN26	fnr	Escherichia coli 1.2741	250
K5H0K4	fnr	Escherichia coli 8.2524	250
K5I4J5	ldhA	Escherichia coli 8.2524	329
K5I5R2	ihfB	Escherichia coli 8.2524	94
K5ITF4	ihfA	Escherichia coli 8.2524	99
I2WF55	fnr	Escherichia coli 9.0111	250
I2WF34	ldhA	Escherichia coli 9.0111	329
I2WDC6	ihfB	Escherichia coli 9.0111	94
I2WE20	ihfA	Escherichia coli 9.0111	99
H5II16	fnr	Escherichia coli DEC12A	250
H5II34	ldhA	Escherichia coli DEC12A	329
H5IGK0	ihfB	Escherichia coli DEC12A	94
H5IJ40	ihfA	Escherichia coli DEC12A	99
I2XA19	fnr	Escherichia coli 2.3916	250
I2X512	ldhA	Escherichia coli 2.3916	329
I2XCJ0	ihfB	Escherichia coli 2.3916	94
I2XEK6	ihfA	Escherichia coli 2.3916	99
I2YHR8	fnr	Escherichia coli 3.2303	250
I2YIM9	ldhA	Escherichia coli 3.2303	329
I2YP14	ihfB	Escherichia coli 3.2303	94
I2YN36	ihfA	Escherichia coli 3.2303	99
H4U2K7	fnr	Escherichia coli DEC5E	250
H4U2M5	ldhA	Escherichia coli DEC5E	329
H4TZR6	ihfB	Escherichia coli DEC5E	94
H4U234	ihfA	Escherichia coli DEC5E	99
I2VP51	fnr	Escherichia coli 5.0959	250
I2VQA4	ldhA	Escherichia coli 5.0959	329
I2VWK4	ihfB	Escherichia coli 5.0959	94
I2VRX7	ihfA	Escherichia coli 5.0959	99
I6G8T5	fnr	Escherichia coli EPECa12	250
I6G8V3	ldhA	Escherichia coli EPECa12	329
I6GDJ4	ihfB	Escherichia coli EPECa12	94
I6G731	ihfA	Escherichia coli EPECa12	99
C2DN95	arcA	Escherichia coli 83972	238
C2DRK7	fnr	Escherichia coli 83972	264
C2DRI8	ldhA	Escherichia coli 83972	329
C2DKG1	ihfB	Escherichia coli 83972	94
C2DQF4	ihfA	Escherichia coli 83972	99
H5MS35	fnr	Escherichia coli DEC14A	250
H5MS51	ldhA	Escherichia coli DEC14A	329
H5MSS3	ihfB	Escherichia coli DEC14A	94
H5MUM7	ihfA	Escherichia coli DEC14A	99
I2UFL2	fnr	Escherichia coli 4.0522	250
I2UG64	ldhA	Escherichia coli 4.0522	329
I2ULY6	ihfB	Escherichia coli 4.0522	94
I2UIH6	ihfA	Escherichia coli 4.0522	99
H4WQG9	fnr	Escherichia coli DEC7A	250
H4WQI6	ldhA	Escherichia coli DEC7A	329
H4WP01	ihfB	Escherichia coli DEC7A	94
H4WRJ8	ihfA	Escherichia coli DEC7A	99
E2QL42	arcA	Escherichia coli	406
C3TBD2	fnr	Escherichia coli	250
C3TB72	ldhA	Escherichia coli	329
Q14F22	ihfB	Escherichia coli	94
Q14F23	ihfA	Escherichia coli	99
E0J495	arcA	Escherichia coli (strain ATCC 9637 / CCM 2024 / DSM 1116 / NCIMB 8666 / NRRL B-766 / W)	238
E0IUS3	fnr	Escherichia coli (strain ATCC 9637 / CCM 2024 / DSM 1116 / NCIMB 8666 / NRRL B-766 / W)	250
E0IUJ5	ldhA	Escherichia coli (strain ATCC 9637 / CCM 2024 / DSM 1116 / NCIMB 8666 / NRRL B-766 / W)	329
E0IZD0	ihfB	Escherichia coli (strain ATCC 9637 / CCM 2024 / DSM 1116 / NCIMB 8666 / NRRL B-766 / W)	94
E0IXI4	ihfA	Escherichia coli (strain ATCC 9637 / CCM 2024 / DSM 1116 / NCIMB 8666 / NRRL B-766 / W)	99
C6EBH0	arcA	Escherichia coli (strain B / BL21-DE3)	238
C6EEW4	ldhA	Escherichia coli (strain B / BL21-DE3)	329
C6EI70	ihfB	Escherichia coli (strain B / BL21-DE3)	94
C6ECP5	himA	Escherichia coli (strain B / BL21-DE3)	99
P0A9Q3	arcA	Escherichia coli O157:H7	238
P0A9E7	fnr	Escherichia coli O157:H7	250
Q8X9Q7	ldhA	Escherichia coli O157:H7	329
P0A6Y3	ihfB	Escherichia coli O157:H7	94
P0A6X9	ihfA	Escherichia coli O157:H7	99
C9QSR8	arcA	Escherichia coli (strain ATCC 33849 / DSM 4235 / NCIB 12045 / K12 / DH1)	238
C9QX18	fnr	Escherichia coli (strain ATCC 33849 / DSM 4235 / NCIB 12045 / K12 / DH1)	250
C9QWX5	ldhA	Escherichia coli (strain ATCC 33849 / DSM 4235 / NCIB 12045 / K12 / DH1)	329
C9QZU0	ihfB	Escherichia coli (strain ATCC 33849 / DSM 4235 / NCIB 12045 / K12 / DH1)	94
C9QTZ5	ihfA	Escherichia coli (strain ATCC 33849 / DSM 4235 / NCIB 12045 / K12 / DH1)	99
E8YEF3	arcA	Escherichia coli (strain ATCC 55124 / KO11)	238
E8YBJ1	fnr	Escherichia coli (strain ATCC 55124 / KO11)	250
E8YAP1	ldhA	Escherichia coli (strain ATCC 55124 / KO11)	329
E8Y3L1	ihfB	Escherichia coli (strain ATCC 55124 / KO11)	94
E8Y6R3	ihfA	Escherichia coli (strain ATCC 55124 / KO11)	99
B7NH76	arcA	Escherichia coli O17:K52:H18 (strain UMN026 / ExPEC)	238
B7N4E1	fnr	Escherichia coli O17:K52:H18 (strain UMN026 / ExPEC)	250
B7N4F9	ldhA	Escherichia coli O17:K52:H18 (strain UMN026 / ExPEC)	329
B7NAR1	ihfB	Escherichia coli O17:K52:H18 (strain UMN026 / ExPEC)	94
B7N550	ihfA	Escherichia coli O17:K52:H18 (strain UMN026 / ExPEC)	99
D5D839	arcA	Escherichia coli O18:K1:H7 (strain IHE3034 / ExPEC)	406
D5D1Y8	fnr	Escherichia coli O18:K1:H7 (strain IHE3034 / ExPEC)	250
D5D2D6	ldhA	Escherichia coli O18:K1:H7 (strain IHE3034 / ExPEC)	329
D5CYV8	ihfB	Escherichia coli O18:K1:H7 (strain IHE3034 / ExPEC)	94
D5D3H8	ihfA	Escherichia coli O18:K1:H7 (strain IHE3034 / ExPEC)	99
C4ZT83	arcA	Escherichia coli (strain K12 / MC4100 / BW2952)	238
C4ZV82	fnr	Escherichia coli (strain K12 / MC4100 / BW2952)	250
C4ZVC3	ldhA	Escherichia coli (strain K12 / MC4100 / BW2952)	329
C4ZQ38	ihfB	Escherichia coli (strain K12 / MC4100 / BW2952)	94
C4ZYH4	ihfA	Escherichia coli (strain K12 / MC4100 / BW2952)	99
B7MTE9	arcA	Escherichia coli O81 (strain ED1a)	238
B7MUH6	fnr	Escherichia coli O81 (strain ED1a)	250
B7MUJ6	ldhA	Escherichia coli O81 (strain ED1a)	329
B7MS27	ihfB	Escherichia coli O81 (strain ED1a)	94
B7MVJ1	ihfA	Escherichia coli O81 (strain ED1a)	99
D3QNG1	arcA	Escherichia coli O55:H7 (strain CB9615 / EPEC)	238
D3QS94	fnr	Escherichia coli O55:H7 (strain CB9615 / EPEC)	250
D3QSG5	ldhA	Escherichia coli O55:H7 (strain CB9615 / EPEC)	329
D3QPA9	ihfB	Escherichia coli O55:H7 (strain CB9615 / EPEC)	94
D3QUQ6	ihfA	Escherichia coli O55:H7 (strain CB9615 / EPEC)	99
D3GY41	arcA	Escherichia coli O44:H18 (strain 042 / EAEC)	238
D3H4B3	fnr	Escherichia coli O44:H18 (strain 042 / EAEC)	250
D3H4J0	ldhA	Escherichia coli O44:H18 (strain 042 / EAEC)	329
D3H0E1	ihfB	Escherichia coli O44:H18 (strain 042 / EAEC)	94
D3GUK3	ihfA	Escherichia coli O44:H18 (strain 042 / EAEC)	99
B7URE2	fnr	Escherichia coli O127:H6 (strain E2348/69 / EPEC)	250
B7URF5	ldhA	Escherichia coli O127:H6 (strain E2348/69 / EPEC)	329
G7RC91	arcA	Escherichia coli (strain 'clone D i2')	407
G7R4L5	fnr	Escherichia coli (strain 'clone D i2')	264
G7RAU5	ihfB	Escherichia coli (strain 'clone D i2')	94
G7R7G5	ihfA	Escherichia coli (strain 'clone D i2')	99
B7LNU3	arcA	Escherichia fergusonii (strain ATCC 35469 / DSM 13698 / CDC 0568-73)	238
B7LRW4	fnr	Escherichia fergusonii (strain ATCC 35469 / DSM 13698 / CDC 0568-73)	250
B7LRU2	ldhA	Escherichia fergusonii (strain ATCC 35469 / DSM 13698 / CDC 0568-73)	329
B7LN74	ihfB	Escherichia fergusonii (strain ATCC 35469 / DSM 13698 / CDC 0568-73)	94
B7LQ77	ihfA	Escherichia fergusonii (strain ATCC 35469 / DSM 13698 / CDC 0568-73)	99
Q1R240	arcA	Escherichia coli (strain UTI89 / UPEC)	238
Q1RC31	fnr	Escherichia coli (strain UTI89 / UPEC)	269
Q1RC13	ldhA	Escherichia coli (strain UTI89 / UPEC)	329
Q1RDU6	ihfB	Escherichia coli (strain UTI89 / UPEC)	94
Q1RB83	ihfA	Escherichia coli (strain UTI89 / UPEC)	99
C8U173	arcA	Escherichia coli O103:H2 (strain 12009 / EHEC)	238
C8U7F2	fnr	Escherichia coli O103:H2 (strain 12009 / EHEC)	250
C8U864	ldhA	Escherichia coli O103:H2 (strain 12009 / EHEC)	329
C8U4J2	ihfB	Escherichia coli O103:H2 (strain 12009 / EHEC)	94
C8U9X7	ihfA	Escherichia coli O103:H2 (strain 12009 / EHEC)	99
G7RK26	arcA	Escherichia coli (strain 'clone D i14')	407
G7RRH1	fnr	Escherichia coli (strain 'clone D i14')	264
G7RRJ0	ldhA	Escherichia coli (strain 'clone D i14')	329
B7MNL0	arcA	Escherichia coli O45:K1 (strain S88 / ExPEC)	238
B7MM10	fnr	Escherichia coli O45:K1 (strain S88 / ExPEC)	250
B7MAS3	ihfA	Escherichia coli O45:K1 (strain S88 / ExPEC)	99
B7MHM1	ihfB	Escherichia coli O45:K1 (strain S88 / ExPEC)	94
B7MM29	ldhA	Escherichia coli O45:K1 (strain S88 / ExPEC)	329
C8UNA8	arcA	Escherichia coli O111:H- (strain 11128 / EHEC)	238
C8UPD3	fnr	Escherichia coli O111:H- (strain 11128 / EHEC)	250
C8UBG8	ihfA	Escherichia coli O111:H- (strain 11128 / EHEC)	99
C8ULD5	ihfB	Escherichia coli O111:H- (strain 11128 / EHEC)	94
C8UPI4	ldhA	Escherichia coli O111:H- (strain 11128 / EHEC)	329
C6UTI2	fnr	Escherichia coli O157:H7 (strain TW14359 / EHEC)	250
C6UW52	ihfA	Escherichia coli O157:H7 (strain TW14359 / EHEC)	99
C6UNH7	ihfB	Escherichia coli O157:H7 (strain TW14359 / EHEC)	94
C6UTJ9	ldhA	Escherichia coli O157:H7 (strain TW14359 / EHEC)	329
A1AJX0	arcA	Escherichia coli O1:K1 / APEC	238
A1AAU6	fnr	Escherichia coli O1:K1 / APEC	264
A1AB14	ldhA	Escherichia coli O1:K1 / APEC	329
G7RFZ0	ihfA	Escherichia coli (strain 'clone D i14')	99
G7RJB0	ihfB	Escherichia coli (strain 'clone D i14')	94
All organisms containign sequences corresponding to ldha, ihfa, ihfb, fnr, arca, dpia
G7RJB0	ihfB	Escherichia coli (strain 'clone D i14')	94
G7RFZ0	ihfA	Escherichia coli (strain 'clone D i14')	99
A1AB14	ldhA	Escherichia coli O1:K1 / APEC	329
A1AAU6	fnr	Escherichia coli O1:K1 / APEC	264
A1AJX0	arcA	Escherichia coli O1:K1 / APEC	238
C6UTJ9	ldhA	Escherichia coli O157:H7 (strain TW14359 / EHEC)	329
C6UNH7	ihfB	Escherichia coli O157:H7 (strain TW14359 / EHEC)	94
C6UW52	ihfA	Escherichia coli O157:H7 (strain TW14359 / EHEC)	99
C6UTI2	fnr	Escherichia coli O157:H7 (strain TW14359 / EHEC)	250
C8UPI4	ldhA	Escherichia coli O111:H- (strain 11128 / EHEC)	329
C8ULD5	ihfB	Escherichia coli O111:H- (strain 11128 / EHEC)	94
C8UBG8	ihfA	Escherichia coli O111:H- (strain 11128 / EHEC)	99
C8UPD3	fnr	Escherichia coli O111:H- (strain 11128 / EHEC)	250
C8UNA8	arcA	Escherichia coli O111:H- (strain 11128 / EHEC)	238
B7MM29	ldhA	Escherichia coli O45:K1 (strain S88 / ExPEC)	329
B7MHM1	ihfB	Escherichia coli O45:K1 (strain S88 / ExPEC)	94
B7MAS3	ihfA	Escherichia coli O45:K1 (strain S88 / ExPEC)	99
B7MM10	fnr	Escherichia coli O45:K1 (strain S88 / ExPEC)	250
B7MNL0	arcA	Escherichia coli O45:K1 (strain S88 / ExPEC)	238
G7RRJ0	ldhA	Escherichia coli (strain 'clone D i14')	329
G7RRH1	fnr	Escherichia coli (strain 'clone D i14')	264
G7RK26	arcA	Escherichia coli (strain 'clone D i14')	407
G7RFU5	dpiA	Escherichia coli (strain 'clone D i14')	226
C8U9X7	ihfA	Escherichia coli O103:H2 (strain 12009 / EHEC)	99
C8U4J2	ihfB	Escherichia coli O103:H2 (strain 12009 / EHEC)	94
C8U864	ldhA	Escherichia coli O103:H2 (strain 12009 / EHEC)	329
C8U7F2	fnr	Escherichia coli O103:H2 (strain 12009 / EHEC)	250
C8U173	arcA	Escherichia coli O103:H2 (strain 12009 / EHEC)	238
Q1RB83	ihfA	Escherichia coli (strain UTI89 / UPEC)	99
Q1RDU6	ihfB	Escherichia coli (strain UTI89 / UPEC)	94
Q1RC13	ldhA	Escherichia coli (strain UTI89 / UPEC)	329
Q1RC31	fnr	Escherichia coli (strain UTI89 / UPEC)	269
Q1R240	arcA	Escherichia coli (strain UTI89 / UPEC)	238
Q1REU0	dpiA	Escherichia coli (strain UTI89 / UPEC)	226
B7LQ77	ihfA	Escherichia fergusonii (strain ATCC 35469 / DSM 13698 / CDC 0568-73)	99
B7LN74	ihfB	Escherichia fergusonii (strain ATCC 35469 / DSM 13698 / CDC 0568-73)	94
B7LRU2	ldhA	Escherichia fergusonii (strain ATCC 35469 / DSM 13698 / CDC 0568-73)	329
B7LRW4	fnr	Escherichia fergusonii (strain ATCC 35469 / DSM 13698 / CDC 0568-73)	250
B7LNU3	arcA	Escherichia fergusonii (strain ATCC 35469 / DSM 13698 / CDC 0568-73)	238
G7R7G5	ihfA	Escherichia coli (strain 'clone D i2')	99
G7RAU5	ihfB	Escherichia coli (strain 'clone D i2')	94
G7R4L5	fnr	Escherichia coli (strain 'clone D i2')	264
G7RC91	arcA	Escherichia coli (strain 'clone D i2')	407
B7URF5	ldhA	Escherichia coli O127:H6 (strain E2348/69 / EPEC)	329
B7URE2	fnr	Escherichia coli O127:H6 (strain E2348/69 / EPEC)	250
D3GUK3	ihfA	Escherichia coli O44:H18 (strain 042 / EAEC)	99
D3H0E1	ihfB	Escherichia coli O44:H18 (strain 042 / EAEC)	94
D3H4J0	ldhA	Escherichia coli O44:H18 (strain 042 / EAEC)	329
D3H4B3	fnr	Escherichia coli O44:H18 (strain 042 / EAEC)	250
D3GY41	arcA	Escherichia coli O44:H18 (strain 042 / EAEC)	238
D3GX84	dpiA	Escherichia coli O44:H18 (strain 042 / EAEC)	226
D3QUQ6	ihfA	Escherichia coli O55:H7 (strain CB9615 / EPEC)	99
D3QPA9	ihfB	Escherichia coli O55:H7 (strain CB9615 / EPEC)	94
D3QSG5	ldhA	Escherichia coli O55:H7 (strain CB9615 / EPEC)	329
D3QS94	fnr	Escherichia coli O55:H7 (strain CB9615 / EPEC)	250
D3QNG1	arcA	Escherichia coli O55:H7 (strain CB9615 / EPEC)	238
B7MVJ1	ihfA	Escherichia coli O81 (strain ED1a)	99
B7MS27	ihfB	Escherichia coli O81 (strain ED1a)	94
B7MUJ6	ldhA	Escherichia coli O81 (strain ED1a)	329
B7MUH6	fnr	Escherichia coli O81 (strain ED1a)	250
B7MTE9	arcA	Escherichia coli O81 (strain ED1a)	238
C4ZYH4	ihfA	Escherichia coli (strain K12 / MC4100 / BW2952)	99
C4ZQ38	ihfB	Escherichia coli (strain K12 / MC4100 / BW2952)	94
C4ZVC3	ldhA	Escherichia coli (strain K12 / MC4100 / BW2952)	329
C4ZV82	fnr	Escherichia coli (strain K12 / MC4100 / BW2952)	250
C4ZT83	arcA	Escherichia coli (strain K12 / MC4100 / BW2952)	238
F0JQK0	arcA	Escherichia fergusonii ECD227	407
G0DD82	ihfA	Escherichia coli NA114	99
G0D5C6	himD	Escherichia coli NA114	94
G0DAF5	ldhA	Escherichia coli NA114	329
G0D1V2	arcA	Escherichia coli NA114	238
G0D069	dpiA	Escherichia coli NA114	226
I2V8G0	fnr	Escherichia coli JB1-95	250
I2V898	ihfA	Escherichia coli JB1-95	99
I2V2Y5	ihfB	Escherichia coli JB1-95	94
I2V8T3	ldhA	Escherichia coli JB1-95	329
I2V3L3	dpiA	Escherichia coli JB1-95	226
I2T873	fnr	Escherichia coli 96.0497	250
I2TBN0	ihfA	Escherichia coli 96.0497	99
I2TDN9	ihfB	Escherichia coli 96.0497	94
I2TBF2	ldhA	Escherichia coli 96.0497	329
I2TDW2	dpiA	Escherichia coli 96.0497	226
P0A9E5	fnr	Escherichia coli (strain K12)	250
P0A6X7	ihfA	Escherichia coli (strain K12)	99
P0A6Y1	ihfB	Escherichia coli (strain K12)	94
P52643	ldhA	Escherichia coli (strain K12)	329
K3I497	ldhA	Escherichia coli TW15901	329
I2ZWE5	fnr	Escherichia coli B41	250
I2ZPG7	ihfA	Escherichia coli B41	99
I2ZX08	ihfB	Escherichia coli B41	94
I2ZX83	ldhA	Escherichia coli B41	329
I2ZVU0	dpiA	Escherichia coli B41	226
K5EPY7	fnr	Escherichia coli 5.2239	250
K5FPL4	ihfA	Escherichia coli 5.2239	99
K5EYP8	ihfB	Escherichia coli 5.2239	94
K5GJL1	ldhA	Escherichia coli 5.2239	329
K5G532	dpiA	Escherichia coli 5.2239	226
K5KJA9	fnr	Escherichia coli 10.0821	250
K5K4C6	ihfA	Escherichia coli 10.0821	99
K5KA33	ihfB	Escherichia coli 10.0821	94
I2XVC9	ihfB	Escherichia coli 3.3884	94
I2XY67	ihfA	Escherichia coli 3.3884	99
I3ADZ0	ldhA	Escherichia coli 900105 (10e)	329
I3ACY8	ihfB	Escherichia coli 900105 (10e)	94
I3A2V8	ihfA	Escherichia coli 900105 (10e)	99
I3A546	fnr	Escherichia coli 900105 (10e)	250
I3AEE9	dpiA	Escherichia coli 900105 (10e)	226
G4PRD6	arcA	Escherichia coli O7:K1 str. CE10	406
G4PWD0	ldhA	Escherichia coli O7:K1 str. CE10	329
G4PNW6	himD	Escherichia coli O7:K1 str. CE10	94
G4Q0R1	ihfA	Escherichia coli O7:K1 str. CE10	99
G4PWB1	fnr	Escherichia coli O7:K1 str. CE10	250
G4PZN9	dpiA	Escherichia coli O7:K1 str. CE10	226
K5KHT3	ldhA	Escherichia coli 10.0821	329
K5JIV8	dpiA	Escherichia coli 10.0821	226
K3I7F0	ihfB	Escherichia coli TW15901	94
K3IUE3	ihfA	Escherichia coli TW15901	99
K3IW44	fnr	Escherichia coli TW15901	250
K3IEJ2	dpiA	Escherichia coli TW15901	219
I2ZAF2	arcA	Escherichia coli TW07793	406
I2Z9C5	ldhA	Escherichia coli TW07793	329
I2Z8W6	ihfB	Escherichia coli TW07793	94
I2ZCK5	ihfA	Escherichia coli TW07793	99
I2Z832	fnr	Escherichia coli TW07793	250
I2Z8B6	dpiA	Escherichia coli TW07793	226
I2SLS2	ldhA	Escherichia coli 1.2264	329
I2SZK9	ihfB	Escherichia coli 1.2264	94
I2SSU1	ihfA	Escherichia coli 1.2264	99
I2SMN0	fnr	Escherichia coli 1.2264	250
I2T0I5	dpiA	Escherichia coli 1.2264	226
H4VF89	ldhA	Escherichia coli DEC6C	329
H4VDN0	ihfB	Escherichia coli DEC6C	94
H4VGI0	ihfA	Escherichia coli DEC6C	99
H4VF68	fnr	Escherichia coli DEC6C	250
H4VCS5	dpiA	Escherichia coli DEC6C	226
K5IAF5	ldhA	Escherichia coli 88.0221	329
K5JV41	ihfB	Escherichia coli 88.0221	94
K5JYH4	ihfA	Escherichia coli 88.0221	99
K5K536	fnr	Escherichia coli 88.0221	250
K5JT69	dpiA	Escherichia coli 88.0221	219
F9I1V6	ldhA	Escherichia coli O104:H4 str. C227-11	329
F9HTD3	himD	Escherichia coli O104:H4 str. C227-11	94
F9HXQ7	himA	Escherichia coli O104:H4 str. C227-11	99
P0A9Q1	arcA	Escherichia coli (strain K12)	238
P0AEF4	dpiA	Escherichia coli (strain K12)	226
I2SBA7	fnr	Escherichia coli 5.0588	250
I2SDS3	dpiA	Escherichia coli 5.0588	226
K5H5I8	arcA	Escherichia coli 8.0566	238
K5H642	ldhA	Escherichia coli 8.0566	329
K5H7L0	ihfB	Escherichia coli 8.0566	94
K5H1J0	ihfA	Escherichia coli 8.0566	99
K5HWA5	fnr	Escherichia coli 8.0566	250
K5G5Y9	dpiA	Escherichia coli 8.0566	226
I2YZI5	arcA	Escherichia coli 3003	406
I2YVX1	ldhA	Escherichia coli 3003	329
I2YYP6	ihfB	Escherichia coli 3003	94
I2YXK2	ihfA	Escherichia coli 3003	99
I2YX41	fnr	Escherichia coli 3003	250
I2YVB6	dpiA	Escherichia coli 3003	226
H4J7P4	ldhA	Escherichia coli DEC1D	329
H4J5S4	ihfB	Escherichia coli DEC1D	94
H4J8Q1	ihfA	Escherichia coli DEC1D	99
B1XD95	ldhA	Escherichia coli (strain K12 / DH10B)	329
B1X852	ihfB	Escherichia coli (strain K12 / DH10B)	94
B1XG19	ihfA	Escherichia coli (strain K12 / DH10B)	99
B1XCG3	fnr	Escherichia coli (strain K12 / DH10B)	250
B7NW82	arcA	Escherichia coli O7:K1 (strain IAI39 / ExPEC)	238
B7NHQ6	ldhA	Escherichia coli O7:K1 (strain IAI39 / ExPEC)	329
B7NM62	ihfB	Escherichia coli O7:K1 (strain IAI39 / ExPEC)	94
B7NT64	ihfA	Escherichia coli O7:K1 (strain IAI39 / ExPEC)	99
B7NHN4	fnr	Escherichia coli O7:K1 (strain IAI39 / ExPEC)	250
P0A9Q2	arcA	Escherichia coli O6:H1 (strain CFT073 / ATCC 700928 / UPEC)	238
Q8FHN9	ldhA	Escherichia coli O6:H1 (strain CFT073 / ATCC 700928 / UPEC)	329
P0A6Y2	ihfB	Escherichia coli O6:H1 (strain CFT073 / ATCC 700928 / UPEC)	94
P0A6X8	ihfA	Escherichia coli O6:H1 (strain CFT073 / ATCC 700928 / UPEC)	99
P0A9E6	fnr	Escherichia coli O6:H1 (strain CFT073 / ATCC 700928 / UPEC)	250
P0AEF5	dpiA	Escherichia coli O6:H1 (strain CFT073 / ATCC 700928 / UPEC)	226
B7LEP7	arcA	Escherichia coli (strain 55989 / EAEC)	238
B7L5B8	ldhA	Escherichia coli (strain 55989 / EAEC)	329
B7LDA4	ihfB	Escherichia coli (strain 55989 / EAEC)	94
B7L6I5	ihfA	Escherichia coli (strain 55989 / EAEC)	99
H9URU3	ihfA	Escherichia coli P12b	99
H9UQH6	ihfB	Escherichia coli P12b	94
H9UPN9	dpiA	Escherichia coli P12b	226
I2XXT1	ldhA	Escherichia coli 3.3884	329
I2XXJ9	fnr	Escherichia coli 3.3884	250
J7QLS3	himA	Escherichia coli chi7122	99
J7RRY3	himD	Escherichia coli chi7122	94
J7R0U0	ldhA	Escherichia coli chi7122	329
J7QL32	fnr	Escherichia coli chi7122	250
K3IS28	ihfA	Escherichia coli TW00353	99
K3JNF0	ihfB	Escherichia coli TW00353	94
K3IUS0	ldhA	Escherichia coli TW00353	329
K3IT74	fnr	Escherichia coli TW00353	250
K3I1P5	dpiA	Escherichia coli TW00353	226
G7R4N4	ldhA	Escherichia coli (strain 'clone D i2')	329
G7R807	dpiA	Escherichia coli (strain 'clone D i2')	226
B7L599	fnr	Escherichia coli (strain 55989 / EAEC)	250
J7R9U6	arcA	Escherichia coli chi7122	238
H5JEI9	dpiA	Escherichia coli DEC12C	226
H5JH22	fnr	Escherichia coli DEC12C	250
H5JH40	ldhA	Escherichia coli DEC12C	329
H5JFI3	ihfB	Escherichia coli DEC12C	94
H5JI64	ihfA	Escherichia coli DEC12C	99
K5I269	dpiA	Escherichia coli 8.0569	208
K5HXY5	fnr	Escherichia coli 8.0569	250
K5GW44	ldhA	Escherichia coli 8.0569	329
K5HA26	ihfB	Escherichia coli 8.0569	94
K5H449	ihfA	Escherichia coli 8.0569	99
I2XRC5	dpiA	Escherichia coli 3.3884	226
B1XFL1	arcA	Escherichia coli (strain K12 / DH10B)	238
C8TR34	fnr	Escherichia coli O26:H11 (strain 11368 / EHEC)	250
C8TSM9	ihfA	Escherichia coli O26:H11 (strain 11368 / EHEC)	99
C8TM27	ihfB	Escherichia coli O26:H11 (strain 11368 / EHEC)	94
C8TRB2	ldhA	Escherichia coli O26:H11 (strain 11368 / EHEC)	329
C8TQF4	arcA	Escherichia coli O26:H11 (strain 11368 / EHEC)	238
C6UGY1	fnr	Escherichia coli (strain B / REL606)	250
C6UJ28	ihfA	Escherichia coli (strain B / REL606)	99
C6UEP7	himD	Escherichia coli (strain B / REL606)	94
C6UH22	ldhA	Escherichia coli (strain B / REL606)	329
C6UM21	arcA	Escherichia coli (strain B / REL606)	238
B7LYK3	fnr	Escherichia coli O8 (strain IAI1)	250
B7M1C1	ihfA	Escherichia coli O8 (strain IAI1)	99
B7M841	ihfB	Escherichia coli O8 (strain IAI1)	94
B7LYM1	ldhA	Escherichia coli O8 (strain IAI1)	329
B7LXW5	arcA	Escherichia coli O8 (strain IAI1)	238
B7US95	ihfA	Escherichia coli O127:H6 (strain E2348/69 / EPEC)	99
B7UMZ8	ihfB	Escherichia coli O127:H6 (strain E2348/69 / EPEC)	94
B7URL3	arcA	Escherichia coli O127:H6 (strain E2348/69 / EPEC)	238
H9USV4	ldhA	Escherichia coli P12b	329
H9V0J1	arcA	Escherichia coli P12b	238
H4JZP3	dpiA	Escherichia coli DEC2A	226
H4K272	fnr	Escherichia coli DEC2A	250
H4K393	ihfA	Escherichia coli DEC2A	99
H4K0P3	ihfB	Escherichia coli DEC2A	94
H4K293	ldhA	Escherichia coli DEC2A	329
H5V242	fnr	Escherichia hermannii NBRC 105704	250
H5UYQ3	ihfA	Escherichia hermannii NBRC 105704	99
H5UX29	ihfB	Escherichia hermannii NBRC 105704	94
H5V5C6	ldhA	Escherichia hermannii NBRC 105704	329
H5UZR3	arcA	Escherichia hermannii NBRC 105704	238
H4VT73	dpiA	Escherichia coli DEC6D	226
H4VVI2	fnr	Escherichia coli DEC6D	250
H4VWH9	ihfA	Escherichia coli DEC6D	99
H4VU19	ihfB	Escherichia coli DEC6D	94
H4VVK0	ldhA	Escherichia coli DEC6D	329
H5I0P4	dpiA	Escherichia coli DEC11E	226
H5I335	fnr	Escherichia coli DEC11E	250
H5I3Z4	ihfA	Escherichia coli DEC11E	99
H5I1Z9	ihfB	Escherichia coli DEC11E	94
H5I351	ldhA	Escherichia coli DEC11E	329
I2TMV8	dpiA	Escherichia coli 3.2608	226
I2TSS7	fnr	Escherichia coli 3.2608	250
I2TUH4	ihfA	Escherichia coli 3.2608	99
I2TVS0	ihfB	Escherichia coli 3.2608	94
I2TTS9	ldhA	Escherichia coli 3.2608	329
H4J4X8	dpiA	Escherichia coli DEC1D	226
H4J7M2	fnr	Escherichia coli DEC1D	250
F0JR59	ldhA	Escherichia fergusonii ECD227	329
F0JL82	ihfB	Escherichia fergusonii ECD227	94
F0JND5	ihfA	Escherichia fergusonii ECD227	99
F0JRT8	fnr	Escherichia fergusonii ECD227	250
K5IIJ6	dpiA	Escherichia coli 10.0869	219
K5J405	ldhA	Escherichia coli 10.0869	329
K5IH84	ihfB	Escherichia coli 10.0869	94
K5IY95	ihfA	Escherichia coli 10.0869	99
K5HZD8	fnr	Escherichia coli 10.0869	250
I2RQ24	dpiA	Escherichia coli 97.0246	219
I2S2Z7	ldhA	Escherichia coli 97.0246	329
I2S5K6	ihfB	Escherichia coli 97.0246	94
I2S305	ihfA	Escherichia coli 97.0246	99
I2RUM8	fnr	Escherichia coli 97.0246	250
H4UFU5	dpiA	Escherichia coli DEC6A	226
H4UIM6	ldhA	Escherichia coli DEC6A	329
H4UGG0	ihfB	Escherichia coli DEC6A	94
H4UJR7	ihfA	Escherichia coli DEC6A	99
H4UIK9	fnr	Escherichia coli DEC6A	250
I2U9X4	dpiA	Escherichia coli 93.0624	226
I2U6X7	ldhA	Escherichia coli 93.0624	329
I2U7Z3	ihfB	Escherichia coli 93.0624	94
I2TW94	ihfA	Escherichia coli 93.0624	99
I2U704	fnr	Escherichia coli 93.0624	250
H4YCI7	dpiA	Escherichia coli DEC7E	226
H4YEF8	ldhA	Escherichia coli DEC7E	329
H4YDK2	ihfB	Escherichia coli DEC7E	94
H4YG40	ihfA	Escherichia coli DEC7E	99
H4YF13	fnr	Escherichia coli DEC7E	250
H4YSY5	dpiA	Escherichia coli DEC8A	219
H4YVM1	ldhA	Escherichia coli DEC8A	329
H4YTT7	ihfB	Escherichia coli DEC8A	94
H4YWC2	ihfA	Escherichia coli DEC8A	99
H4YVE7	fnr	Escherichia coli DEC8A	250
I2S7Y5	ldhA	Escherichia coli 5.0588	329
I2SJX4	ihfB	Escherichia coli 5.0588	94
I2SIG0	ihfA	Escherichia coli 5.0588	99
K5I778	dpiA	Escherichia coli 8.0586	226
K5HFE6	ihfA	Escherichia coli 8.0586	99
K5H2G7	ihfB	Escherichia coli 8.0586	94
K5IAV6	ldhA	Escherichia coli 8.0586	329
K5HA16	fnr	Escherichia coli 8.0586	250
K6VK68	arcA	Escherichia blattae NBRC 105725	238
K6VDE1	ihfA	Escherichia blattae NBRC 105725	99
K6VSU0	ihfB	Escherichia blattae NBRC 105725	94
K6VZV5	ldhA	Escherichia blattae NBRC 105725	329
K6UQV9	fnr	Escherichia blattae NBRC 105725	250
I2VCP2	dpiA	Escherichia coli 96.154	226
I2VFZ8	ihfA	Escherichia coli 96.154	99
I2VDM5	ihfB	Escherichia coli 96.154	94
I2VLZ8	ldhA	Escherichia coli 96.154	329
I2VHC8	fnr	Escherichia coli 96.154	250
K3VG74	dpiA	Escherichia coli 0.1288	226
K3UF84	ihfA	Escherichia coli 0.1288	99
K3VFG7	ihfB	Escherichia coli 0.1288	94
K3UH56	ldhA	Escherichia coli 0.1288	329
K3UK98	fnr	Escherichia coli 0.1288	250
H5H3R4	dpiA	Escherichia coli DEC11C	226
H5H7K8	ihfA	Escherichia coli DEC11C	99
H5H4M3	ihfB	Escherichia coli DEC11C	94
H5H6H1	ldhA	Escherichia coli DEC11C	329
H5H6F3	fnr	Escherichia coli DEC11C	250
I2Y237	dpiA	Escherichia coli 2.4168	226
I2Y754	ihfA	Escherichia coli 2.4168	99
I2Y310	ihfB	Escherichia coli 2.4168	94
I2Y0G3	ldhA	Escherichia coli 2.4168	329
I2Y254	fnr	Escherichia coli 2.4168	250
K5F2A1	dpiA	Escherichia coli 3.4870	219
K5FRJ3	ihfA	Escherichia coli 3.4870	99
K5FSG0	ihfB	Escherichia coli 3.4870	94
K5GLF4	ldhA	Escherichia coli 3.4870	329
K5FWI9	fnr	Escherichia coli 3.4870	250
I2WSA2	dpiA	Escherichia coli 4.0967	226
I2WU31	ihfA	Escherichia coli 4.0967	99
I2WVW0	ihfB	Escherichia coli 4.0967	94
I2WNJ1	ldhA	Escherichia coli 4.0967	329
I2WNH3	fnr	Escherichia coli 4.0967	250
H5HLC7	dpiA	Escherichia coli DEC11D	226
H5HPQ7	ihfA	Escherichia coli DEC11D	99
H5HMB1	ihfB	Escherichia coli DEC11D	94
H5HNW5	ldhA	Escherichia coli DEC11D	329
H5HNU8	fnr	Escherichia coli DEC11D	250
I2RA94	dpiA	Escherichia coli 1.2741	226
I2RJT9	ihfA	Escherichia coli 1.2741	99
I2RAQ5	ihfB	Escherichia coli 1.2741	94
I2RMP7	ldhA	Escherichia coli 1.2741	329
I2RN26	fnr	Escherichia coli 1.2741	250
K5IKX6	dpiA	Escherichia coli 8.2524	226
K5H0K4	fnr	Escherichia coli 8.2524	250
K5I4J5	ldhA	Escherichia coli 8.2524	329
K5I5R2	ihfB	Escherichia coli 8.2524	94
K5ITF4	ihfA	Escherichia coli 8.2524	99
I2W5S5	dpiA	Escherichia coli 9.0111	226
I2WF55	fnr	Escherichia coli 9.0111	250
I2WF34	ldhA	Escherichia coli 9.0111	329
I2WDC6	ihfB	Escherichia coli 9.0111	94
I2WE20	ihfA	Escherichia coli 9.0111	99
H5IFM2	dpiA	Escherichia coli DEC12A	226
H5II16	fnr	Escherichia coli DEC12A	250
H5II34	ldhA	Escherichia coli DEC12A	329
H5IGK0	ihfB	Escherichia coli DEC12A	94
H5IJ40	ihfA	Escherichia coli DEC12A	99
I2X7P2	dpiA	Escherichia coli 2.3916	226
I2XA19	fnr	Escherichia coli 2.3916	250
I2X512	ldhA	Escherichia coli 2.3916	329
I2XCJ0	ihfB	Escherichia coli 2.3916	94
I2XEK6	ihfA	Escherichia coli 2.3916	99
I2YRW9	dpiA	Escherichia coli 3.2303	226
I2YHR8	fnr	Escherichia coli 3.2303	250
I2YIM9	ldhA	Escherichia coli 3.2303	329
I2YP14	ihfB	Escherichia coli 3.2303	94
I2YN36	ihfA	Escherichia coli 3.2303	99
H4TZ15	dpiA	Escherichia coli DEC5E	226
H4U2K7	fnr	Escherichia coli DEC5E	250
H4U2M5	ldhA	Escherichia coli DEC5E	329
H4TZR6	ihfB	Escherichia coli DEC5E	94
H4U234	ihfA	Escherichia coli DEC5E	99
I2VWN5	dpiA	Escherichia coli 5.0959	226
I2VP51	fnr	Escherichia coli 5.0959	250
I2VQA4	ldhA	Escherichia coli 5.0959	329
I2VWK4	ihfB	Escherichia coli 5.0959	94
I2VRX7	ihfA	Escherichia coli 5.0959	99
I6GES6	dpiA	Escherichia coli EPECa12	226
I6G8T5	fnr	Escherichia coli EPECa12	250
I6G8V3	ldhA	Escherichia coli EPECa12	329
I6GDJ4	ihfB	Escherichia coli EPECa12	94
I6G731	ihfA	Escherichia coli EPECa12	99
C2DN95	arcA	Escherichia coli 83972	238
C2DRK7	fnr	Escherichia coli 83972	264
C2DRI8	ldhA	Escherichia coli 83972	329
C2DKG1	ihfB	Escherichia coli 83972	94
C2DQF4	ihfA	Escherichia coli 83972	99
H5MR67	dpiA	Escherichia coli DEC14A	226
H5MS35	fnr	Escherichia coli DEC14A	250
H5MS51	ldhA	Escherichia coli DEC14A	329
H5MSS3	ihfB	Escherichia coli DEC14A	94
H5MUM7	ihfA	Escherichia coli DEC14A	99
I2UKN8	dpiA	Escherichia coli 4.0522	226
I2UFL2	fnr	Escherichia coli 4.0522	250
I2UG64	ldhA	Escherichia coli 4.0522	329
I2ULY6	ihfB	Escherichia coli 4.0522	94
I2UIH6	ihfA	Escherichia coli 4.0522	99
H4WN95	dpiA	Escherichia coli DEC7A	226
H4WQG9	fnr	Escherichia coli DEC7A	250
H4WQI6	ldhA	Escherichia coli DEC7A	329
H4WP01	ihfB	Escherichia coli DEC7A	94
H4WRJ8	ihfA	Escherichia coli DEC7A	99
E2QL42	arcA	Escherichia coli	406
C3TBD2	fnr	Escherichia coli	250
C3TB72	ldhA	Escherichia coli	329
Q14F22	ihfB	Escherichia coli	94
Q14F23	ihfA	Escherichia coli	99
E0J1Q6	dpiA	Escherichia coli (strain ATCC 9637 / CCM 2024 / DSM 1116 / NCIMB 8666 / NRRL B-766 / W)	226
E0J495	arcA	Escherichia coli (strain ATCC 9637 / CCM 2024 / DSM 1116 / NCIMB 8666 / NRRL B-766 / W)	238
E0IUS3	fnr	Escherichia coli (strain ATCC 9637 / CCM 2024 / DSM 1116 / NCIMB 8666 / NRRL B-766 / W)	250
E0IUJ5	ldhA	Escherichia coli (strain ATCC 9637 / CCM 2024 / DSM 1116 / NCIMB 8666 / NRRL B-766 / W)	329
E0IZD0	ihfB	Escherichia coli (strain ATCC 9637 / CCM 2024 / DSM 1116 / NCIMB 8666 / NRRL B-766 / W)	94
E0IXI4	ihfA	Escherichia coli (strain ATCC 9637 / CCM 2024 / DSM 1116 / NCIMB 8666 / NRRL B-766 / W)	99
C6EBH0	arcA	Escherichia coli (strain B / BL21-DE3)	238
C6EEW4	ldhA	Escherichia coli (strain B / BL21-DE3)	329
C6EI70	ihfB	Escherichia coli (strain B / BL21-DE3)	94
C6ECP5	himA	Escherichia coli (strain B / BL21-DE3)	99
P0AEF6	dpiA	Escherichia coli O157:H7	226
P0A9Q3	arcA	Escherichia coli O157:H7	238
P0A9E7	fnr	Escherichia coli O157:H7	250
Q8X9Q7	ldhA	Escherichia coli O157:H7	329
P0A6Y3	ihfB	Escherichia coli O157:H7	94
P0A6X9	ihfA	Escherichia coli O157:H7	99
C9R1A0	dpiA	Escherichia coli (strain ATCC 33849 / DSM 4235 / NCIB 12045 / K12 / DH1)	226
C9QSR8	arcA	Escherichia coli (strain ATCC 33849 / DSM 4235 / NCIB 12045 / K12 / DH1)	238
C9QX18	fnr	Escherichia coli (strain ATCC 33849 / DSM 4235 / NCIB 12045 / K12 / DH1)	250
C9QWX5	ldhA	Escherichia coli (strain ATCC 33849 / DSM 4235 / NCIB 12045 / K12 / DH1)	329
C9QZU0	ihfB	Escherichia coli (strain ATCC 33849 / DSM 4235 / NCIB 12045 / K12 / DH1)	94
C9QTZ5	ihfA	Escherichia coli (strain ATCC 33849 / DSM 4235 / NCIB 12045 / K12 / DH1)	99
E8Y6Y8	dpiA	Escherichia coli (strain ATCC 55124 / KO11)	226
E8YEF3	arcA	Escherichia coli (strain ATCC 55124 / KO11)	238
E8YBJ1	fnr	Escherichia coli (strain ATCC 55124 / KO11)	250
E8YAP1	ldhA	Escherichia coli (strain ATCC 55124 / KO11)	329
E8Y3L1	ihfB	Escherichia coli (strain ATCC 55124 / KO11)	94
E8Y6R3	ihfA	Escherichia coli (strain ATCC 55124 / KO11)	99
B7NH76	arcA	Escherichia coli O17:K52:H18 (strain UMN026 / ExPEC)	238
B7N4E1	fnr	Escherichia coli O17:K52:H18 (strain UMN026 / ExPEC)	250
B7N4F9	ldhA	Escherichia coli O17:K52:H18 (strain UMN026 / ExPEC)	329
B7NAR1	ihfB	Escherichia coli O17:K52:H18 (strain UMN026 / ExPEC)	94
B7N550	ihfA	Escherichia coli O17:K52:H18 (strain UMN026 / ExPEC)	99
D5CX69	dpiA	Escherichia coli O18:K1:H7 (strain IHE3034 / ExPEC)	226
D5D839	arcA	Escherichia coli O18:K1:H7 (strain IHE3034 / ExPEC)	406
D5D1Y8	fnr	Escherichia coli O18:K1:H7 (strain IHE3034 / ExPEC)	250
D5D2D6	ldhA	Escherichia coli O18:K1:H7 (strain IHE3034 / ExPEC)	329
D5CYV8	ihfB	Escherichia coli O18:K1:H7 (strain IHE3034 / ExPEC)	94
D5D3H8	ihfA	Escherichia coli O18:K1:H7 (strain IHE3034 / ExPEC)	99
C4ZWA9	dpiA	Escherichia coli (strain K12 / MC4100 / BW2952)	226
